# Supplementary material for: STUDI IMPLEMENTASI PROGRAM PEMBERbAYAANEKONOMI RAKYAT (PER) BIDANG PETERNAKAN b/KABUPATEN GROBOGAN
Source: Royal Society of Chemistry journal article supplement (doi:10.1039/c3dt52180j), 2003-01-01
Supplement: c3dt52180j.pdf [file c3dt52180j.pdf]

## SUPPORTING INFORMATION

### **Molecular tailoring: a possible synthetic route to hexasilabenzene**

Zsolt Benedek, Tibor Szilvási and Tamás Veszprémi\*

*Department of Inorganic and Analytical Chemistry, Budapest University of Technology and Economics  
(BUTE), Szent Gellért tér 4, 1521 Budapest, Hungary*

\*Corresponding author. E-mail: [Tveszpremi@mail.bme.hu](mailto:Tveszpremi@mail.bme.hu)

To confirm the reliability of the chosen B97-D functional and estimate the error bar, we have carried out a benchmark study on hydrogen substituted tetrapersila compounds (**A3-A6**). CCSD(T)/cc-pVTZ, RI-B97-D/cc-pVTZ, B3LYP/cc-pVTZ and M06-2X/cc-pVTZ energies ( $E$ , in Hartree) were computed at RI-B97-D/6-31G\* optimized geometries (Table S1). Since our main conclusions are drawn from the relative stability of optimized structures on a PES, Table S1 contains the relative energies ( $\Delta E$ , in kJ/mol) compared to **A6**, respectively, for all computed energy results. The relative difference compared to CCSD(T)/cc-pVTZ results are also shown ( $\Delta\Delta E$ ) in Table S1 in kJ/mol ( $\Delta\Delta E = \Delta E_{\text{CCSD(T)}} - \Delta E_{\text{DFT}}$ ). As one can see in Table S1,  $\Delta\Delta E$  clearly indicates that the relative error is reasonable for RI-B97-D method (RMS = 10 kJ/mol) similar to that of the most popular B3LYP and M06-2X DFT methods (RMS are 13 and 14 kJ/mol, respectively). The error bar is estimated by that about  $\pm 15$  kJ/mol for this small molecules. For large molecules with real substituent, the error bar is obviously greater, which is expected to be about  $\pm 30$  kJ/mol. Since our main results are based on the elimination of unwanted minima protecting only one, error bars have negligible role in this study.





**Table S5. Thermal corrections to Gibbs free energy at B97-D/6-31G\* level (Hartree)**

| Substituents | Gibbs free energy of formation |                                |          |          |          |          |          |                                |          |
|--------------|--------------------------------|--------------------------------|----------|----------|----------|----------|----------|--------------------------------|----------|
| R            | Si <sub>2</sub> R <sub>2</sub> | Si <sub>4</sub> R <sub>4</sub> |          |          |          |          |          | Si <sub>6</sub> R <sub>6</sub> |          |
|              | 1                              | 2                              | 2-TS     | 3        | 4        | 5        | 6        | 7                              | 7-TS     |
| <b>A</b>     | -0.011687                      | -                              | -        | 0.001607 | 0.002176 | 0.002286 | 0.003315 | 0.011346                       | 0.011771 |
| <b>B</b>     | 0.134336                       | -                              | -        | 0.294084 | 0.296674 | 0.29509  | 0.299438 | 0.459931                       | 0.458618 |
| <b>C</b>     | 0.423018                       | 0.888938                       | 0.889996 | -        | -        | 0.892359 | -        | 1.364001                       | 1.362663 |
| <b>D</b>     | 0.627172                       | -                              | -        | -        | -        | 1.313714 | -        | 2.000485                       | -        |

  

| R        | Si <sub>6</sub> R <sub>6</sub> |          |          |          |          |          |          | Si <sub>8</sub> R <sub>8</sub> |          |
|----------|--------------------------------|----------|----------|----------|----------|----------|----------|--------------------------------|----------|
|          | 8                              | 8-TS     | 9        | 9-TS     | 10       | 11       | 12       | 13                             | 14       |
| <b>A</b> | 0.017058                       | 0.015731 | 0.014506 | 0.014238 | 0.015906 | 0.015739 | 0.018355 | 0.032410                       | 0.029911 |
| <b>B</b> | 0.455869                       | 0.459353 | 0.458485 | 0.460189 | 0.459585 | 0.453025 | 0.455381 | 0.627645                       | 0.621218 |
| <b>C</b> | -                              | -        | -        | -        | 1.356153 | -        | -        | -                              | -        |
| <b>D</b> | -                              | -        | -        | -        | -        | -        | -        | -                              | -        |

We have calculated all investigated reactions using Polarizable Continuum Model (PCM) solvation model. One can easily compare the results obtained with solvation model or in gas phase (Table S5 and S6). The use of the solvation model causes only a ~10 kJ/mol shift in the energies. Considering the several hundreds kJ/mol energy gain during the reactions, the solvation effect has negligible role in this study and do not change any conclusions that we have drawn.

**Table S6. Gibbs free energy of the formation of different silicon compounds from disilyne in gas phase in kJ/mol.**

| Substituents | Gibbs free energy of formation |                                |      |      |      |      |      |                                |      |
|--------------|--------------------------------|--------------------------------|------|------|------|------|------|--------------------------------|------|
| R            | Si <sub>2</sub> R <sub>2</sub> | Si <sub>4</sub> R <sub>4</sub> |      |      |      |      |      | Si <sub>6</sub> R <sub>6</sub> |      |
|              | 1                              | 2                              | 2-TS | 3    | 4    | 5    | 6    | 7                              | 7-TS |
| <b>A</b>     | 0                              | -                              | -    | -291 | -292 | -265 | -311 | -429                           | -347 |
| <b>B</b>     | 0                              | -                              | -    | -314 | -303 | -292 | -334 | -415                           | -383 |
| <b>C</b>     | 0                              | -230                           | -216 | -    | -    | -276 | -    | -244                           | -227 |
| <b>D</b>     | 0                              | -                              | -    | -    | -    | -11  | -    | +473                           | -    |

  

| R        | Si <sub>6</sub> R <sub>6</sub> |      |      |      |      |      |      | Si <sub>8</sub> R <sub>8</sub> |      |
|----------|--------------------------------|------|------|------|------|------|------|--------------------------------|------|
|          | 8                              | 8-TS | 9    | 9-TS | 10   | 11   | 12   | 13                             | 14   |
| <b>A</b> | -572                           | -519 | -524 | -482 | -587 | -549 | -581 | -848                           | -857 |
| <b>B</b> | -583                           | -553 | -566 | -516 | -596 | -598 | -602 | -886                           | -915 |
| <b>C</b> | -                              | -    | -    | -    | -555 | -    | -    | -                              | -    |
| <b>D</b> | -                              | -    | -    | -    | -    | -    | -    | -                              | -    |

**Table S7. Gibbs free energy of the formation of different silicon compounds from disilyne in THF in kJ/mol.**

| Substituents | Gibbs free energy of formation |                                |      |      |      |      |      |                                |      |
|--------------|--------------------------------|--------------------------------|------|------|------|------|------|--------------------------------|------|
| R            | Si <sub>2</sub> R <sub>2</sub> | Si <sub>4</sub> R <sub>4</sub> |      |      |      |      |      | Si <sub>6</sub> R <sub>6</sub> |      |
|              | 1                              | 2                              | 2-TS | 3    | 4    | 5    | 6    | 7                              | 7-TS |
| <b>A</b>     | 0                              | -                              | -    | -285 | -287 | -257 | -303 | -421                           | -341 |

|          |                                    |             |          |             |           |           |           |                                    |           |
|----------|------------------------------------|-------------|----------|-------------|-----------|-----------|-----------|------------------------------------|-----------|
| <b>B</b> | 0                                  | -           | -        | -308        | -301      | -283      | -322      | -410                               | -370      |
| <b>C</b> | 0                                  | -216        | -202     | -           | -         | -257      | -         | -221                               | -202      |
| <b>D</b> | 0                                  | -           | -        | -           | -         | -1        | -         | +485                               | -         |
| <b>R</b> | <b>Si<sub>6</sub>R<sub>6</sub></b> |             |          |             |           |           |           | <b>Si<sub>8</sub>R<sub>8</sub></b> |           |
|          | <b>8</b>                           | <b>8-TS</b> | <b>9</b> | <b>9-TS</b> | <b>10</b> | <b>11</b> | <b>12</b> | <b>13</b>                          | <b>14</b> |
| <b>A</b> | -560                               | -509        | -515     | -473        | -575      | -538      | -569      | -837                               | -841      |
| <b>B</b> | -570                               | -540        | -555     | -505        | -581      | -589      | -591      | -870                               | -894      |
| <b>C</b> | -                                  | -           | -        | -           | -524      | -         | -         | -                                  | -         |
| <b>D</b> | -                                  | -           | -        | -           | -         | -         | -         | -                                  | -         |

**Optimized geometries at B97-D/6-31G\* level (coordinates given in Angstroms):**

**A1**

Si 0.000000 0.000000 0.000000  
 Si 0.000000 0.000000 2.123838  
 H 1.249256 0.000000 -0.842698  
 H -1.249256 0.000218 2.966536

**A3**

Si -0.008117 -1.306100 -0.117523  
 Si -1.833132 -0.000009 0.290669  
 Si -0.008135 1.306107 -0.117521  
 Si 1.921246 0.000003 0.054640  
 H -0.166997 2.355847 -1.187222  
 H -2.998758 -0.000019 -0.682378  
 H -0.166981 -2.355838 -1.187226  
 H 2.326657 -0.000005 1.513107

**A4**

Si 0.016019 -1.228365 0.298632  
 Si 1.767390 -0.000017 -0.415578  
 Si 0.016052 1.228380 0.298624  
 Si -1.864664 0.000002 -0.446022  
 H 0.123476 2.365152 1.275072  
 H 3.141178 -0.000042 0.184909  
 H 0.123446 -2.365123 1.275097  
 H -2.475252 0.000018 0.965745

**A5**

Si 0.000007 -1.182823 -0.620507  
 Si -1.555203 -0.000027 0.574228  
 Si -0.000005 1.182855 -0.620470  
 Si 1.555245 -0.000002 0.574256  
 H 0.000053 -2.425909 -1.445904  
 H -0.000145 2.425951 -1.445852

H -1.576398 -0.000085 2.093301  
H 1.575857 -0.000002 2.093349

### A6

Si -0.002467 -1.534203 -0.417438  
Si 1.534342 -0.002524 0.417363  
Si 0.002492 1.534175 -0.417299  
Si -1.534391 0.002432 0.417368  
H 1.424781 -0.001740 1.922691  
H -1.424468 0.001879 1.922684  
H 0.001817 1.424622 -1.922617  
H -0.001779 -1.423079 -1.922673

### A7

|    |           |           |           |
|----|-----------|-----------|-----------|
| Si | 0.000000  | 0.000000  | 0.000000  |
| Si | 0.000000  | 0.000000  | 2.546455  |
| Si | 1.933901  | 0.000000  | 1.257971  |
| Si | -1.610016 | -1.095390 | 1.275695  |
| Si | -3.021517 | 0.724922  | 1.357677  |
| Si | -3.101044 | 2.072006  | -0.522564 |
| H  | 2.468497  | 1.422153  | 1.226492  |
| H  | -0.484589 | 1.163704  | 3.367677  |
| H  | -1.805827 | -2.575305 | 1.290726  |
| H  | -0.450132 | 1.099434  | -0.925944 |
| H  | -3.422006 | 1.013323  | 2.780717  |
| H  | -3.643202 | 3.239274  | 0.333161  |

### A8

|    |           |           |           |
|----|-----------|-----------|-----------|
| Si | -0.033833 | -0.029645 | -0.000546 |
| Si | -0.016468 | 0.153452  | 2.322099  |
| Si | 2.112330  | -0.235735 | 2.799250  |
| Si | 3.126285  | 0.000839  | 0.714759  |
| Si | 1.800878  | 1.152104  | -0.863787 |
| Si | 1.847691  | -1.151700 | -0.880396 |
| H  | 2.058967  | -2.382183 | -1.716603 |
| H  | 1.963845  | 2.401800  | -1.682160 |
| H  | 4.607956  | -0.010205 | 0.526545  |
| H  | 2.758462  | 0.145877  | 4.094523  |
| H  | -1.155597 | -0.251756 | 3.204689  |
| H  | -1.290438 | -0.007274 | -0.807592 |

### A7-TS

|    |           |           |           |
|----|-----------|-----------|-----------|
| Si | 0.000000  | 0.000000  | 0.000000  |
| Si | 0.000000  | 0.000000  | 2.562687  |
| Si | 1.896439  | 0.000000  | 1.318712  |
| Si | -1.469122 | -1.299364 | 1.302305  |
| Si | -3.649323 | -1.001434 | 0.445316  |
| Si | -3.072904 | -1.290387 | -1.742068 |
| H  | 2.629009  | 1.313107  | 1.434975  |

|   |           |           |           |
|---|-----------|-----------|-----------|
| H | -0.381729 | 1.084755  | 3.525057  |
| H | -0.936509 | -2.696938 | 1.380900  |
| H | -0.467757 | 1.297130  | -0.588926 |
| H | -4.452747 | -2.134612 | 1.038067  |
| H | -4.419479 | -1.399206 | -2.468733 |

#### A8-TS

|    |           |           |           |
|----|-----------|-----------|-----------|
| Si | -0.033102 | 0.077490  | 0.040027  |
| Si | -0.119325 | -0.100478 | 2.346920  |
| Si | 2.033566  | 0.030817  | 1.313039  |
| Si | 3.032305  | 1.989302  | 0.806860  |
| Si | 1.575334  | 3.518800  | 0.002329  |
| Si | -0.330363 | 2.368942  | 0.194055  |
| H  | 0.090068  | -0.600326 | -1.294930 |
| H  | -1.694040 | 2.976722  | 0.257290  |
| H  | 1.754220  | 4.965086  | 0.349448  |
| H  | 4.514518  | 2.161303  | 0.677698  |
| H  | 2.883755  | -1.193017 | 1.169350  |
| H  | -0.197259 | -1.581057 | 2.703044  |

#### A9

|    |           |           |           |
|----|-----------|-----------|-----------|
| Si | 0.000000  | 0.000000  | 0.000000  |
| Si | 0.000000  | 0.000000  | 2.455711  |
| Si | 2.299474  | 0.000000  | 2.815059  |
| Si | 3.386048  | -1.181337 | 1.297961  |
| Si | 1.872179  | -1.175167 | -0.392504 |
| Si | -0.310784 | 1.999948  | 1.302958  |
| H  | 2.001264  | -2.122818 | -1.545490 |
| H  | 4.861519  | -1.199308 | 1.046178  |
| H  | -1.831753 | 1.931394  | 1.138163  |
| H  | -1.189747 | -0.627211 | -0.662626 |
| H  | -0.725264 | -1.230836 | 2.922381  |
| H  | 2.933277  | 0.696425  | 3.975591  |

#### A9-TS

|    |           |           |           |
|----|-----------|-----------|-----------|
| Si | 0.000000  | 0.000000  | 0.000000  |
| Si | 0.000000  | 0.000000  | 2.249680  |
| Si | 1.681268  | 0.000000  | 3.860607  |
| Si | 2.690637  | -1.374301 | 2.388083  |
| Si | 3.687784  | -0.802197 | 0.300233  |
| Si | 2.130106  | 0.650772  | -0.482804 |
| H  | -1.156373 | 0.753739  | -0.589678 |
| H  | -1.317087 | -0.327398 | 2.895912  |
| H  | 2.391980  | 1.418931  | -1.747389 |
| H  | 4.859310  | 0.044497  | 0.757628  |
| H  | 3.000920  | -2.777686 | 2.837991  |
| H  | 1.124325  | -0.974864 | 4.880538  |

#### A10

|    |           |           |           |
|----|-----------|-----------|-----------|
| Si | 0.000000  | 0.000000  | 0.000000  |
| Si | 0.000000  | 0.000000  | 2.255748  |
| Si | 2.033733  | 0.000000  | 3.231634  |
| Si | 3.582309  | 1.318793  | 2.256279  |
| Si | 3.582279  | 1.318798  | 0.000532  |
| Si | 1.548551  | 1.318837  | -0.975361 |
| H  | -1.037147 | -0.864507 | 2.907270  |
| H  | 2.037727  | -0.012860 | 4.730719  |
| H  | 4.932439  | 1.332647  | 2.907865  |
| H  | 4.619465  | 2.183251  | -0.650998 |
| H  | 1.544565  | 1.331685  | -2.474446 |
| H  | -1.350108 | -0.013932 | -0.651632 |

### A11

|    |           |           |           |
|----|-----------|-----------|-----------|
| H  | -2.770222 | 2.238822  | -1.078944 |
| Si | -1.901532 | 1.158948  | -0.513554 |
| Si | -2.153803 | -0.995943 | -0.267924 |
| H  | -2.977395 | -1.988032 | -1.028570 |
| Si | -0.060975 | -1.194834 | 0.783972  |
| H  | -0.043374 | -1.958251 | 2.072541  |
| Si | 0.060974  | 1.194833  | 0.783977  |
| H  | 0.043372  | 1.958248  | 2.072548  |
| Si | 2.153798  | 0.995944  | -0.267927 |
| H  | 2.977402  | 1.988033  | -1.028556 |
| Si | 1.901538  | -1.158948 | -0.513548 |
| H  | 2.770220  | -2.238815 | -1.078962 |

### A12

|    |           |           |           |
|----|-----------|-----------|-----------|
| Si | -1.196567 | -0.891737 | -1.043792 |
| Si | 1.196398  | -0.891472 | -1.044084 |
| Si | 1.196045  | 1.350012  | -0.250433 |
| Si | -1.196742 | 1.349750  | -0.250035 |
| Si | -1.195980 | -0.458491 | 1.294234  |
| Si | 1.196816  | -0.458191 | 1.293912  |
| H  | 2.181224  | -1.628298 | -1.908133 |
| H  | 2.180742  | 2.466855  | -0.456573 |
| H  | -2.180686 | 2.467311  | -0.456019 |
| H  | -2.180566 | -0.837057 | 2.365146  |
| H  | 2.181227  | -0.837069 | 2.364888  |
| H  | -2.181532 | -1.629912 | -1.906535 |

### A13

|    |          |          |           |
|----|----------|----------|-----------|
| Si | 0.000000 | 0.000000 | 0.000000  |
| Si | 0.000000 | 0.000000 | 2.354663  |
| Si | 2.484670 | 0.000000 | 3.146714  |
| Si | 1.139266 | 1.946091 | 2.934175  |
| Si | 1.647272 | 3.481530 | 1.177981  |
| Si | 1.138444 | 1.946873 | -0.578640 |
| Si | 2.484182 | 0.000974 | -0.792269 |



|    |           |           |           |
|----|-----------|-----------|-----------|
| Si | 2.000906  | -1.117651 | 1.176944  |
| H  | 0.806126  | 2.393372  | -1.968500 |
| H  | -0.726468 | -1.095266 | -0.71255  |
| H  | -0.725566 | -1.095830 | 3.067300  |
| H  | 2.024542  | -0.896607 | 4.271057  |
| H  | 2.023995  | -0.895026 | -1.917357 |
| H  | 0.202461  | 4.010781  | 1.178676  |
| H  | 0.806408  | 2.392284  | 4.324004  |
| H  | 1.870612  | -2.604888 | 1.176917  |

#### A14

|    |           |           |           |
|----|-----------|-----------|-----------|
| Si | 0.000000  | 0.000000  | 0.000000  |
| Si | 0.000000  | 0.000000  | 2.327349  |
| Si | 2.019597  | 0.000000  | 1.176979  |
| Si | 1.328836  | 1.912443  | 2.327378  |
| Si | 0.339119  | 3.530146  | 0.933218  |
| Si | -1.854889 | 4.059014  | 1.554268  |
| Si | -2.715799 | 2.881474  | -0.062528 |
| Si | -0.612905 | 2.137584  | -0.774580 |
| H  | -0.759489 | -0.745230 | 3.375395  |
| H  | -0.395278 | -1.268232 | -0.684649 |
| H  | 3.319876  | -0.729606 | 1.042349  |
| H  | 2.037200  | 2.249042  | 3.599475  |
| H  | 1.236866  | 4.642554  | 0.478261  |
| H  | -0.219049 | 2.447140  | -2.188571 |
| H  | -2.430547 | 4.841455  | 2.692810  |
| H  | -4.106575 | 2.418876  | -0.366969 |

#### B1

|    |           |           |           |
|----|-----------|-----------|-----------|
| C  | 0.000000  | 0.000000  | 0.000000  |
| C  | 0.000000  | 0.000000  | 1.420487  |
| C  | 1.251468  | 0.000000  | 2.090113  |
| C  | 2.454603  | -0.016728 | 1.370064  |
| C  | 2.432025  | -0.033673 | -0.033912 |
| C  | 1.203327  | -0.027675 | -0.716976 |
| Si | -1.603950 | 0.075775  | 2.421875  |
| Si | -3.297408 | -1.235873 | 2.139045  |
| C  | -5.075999 | -0.826563 | 2.639303  |
| C  | -5.708854 | 0.382100  | 2.243814  |
| C  | -7.036597 | 0.647330  | 2.603820  |
| C  | -7.768421 | -0.295620 | 3.346510  |
| C  | -7.167010 | -1.504272 | 3.733044  |
| C  | -5.834836 | -1.767430 | 3.383265  |
| H  | -5.373545 | -2.706992 | 3.697900  |
| H  | -7.733445 | -2.238214 | 4.310636  |
| H  | -8.805372 | -0.088875 | 3.620732  |
| H  | -7.503498 | 1.588040  | 2.303018  |
| H  | -5.148953 | 1.115422  | 1.660255  |
| H  | -0.950406 | 0.012505  | -0.536994 |

|   |          |           |           |
|---|----------|-----------|-----------|
| H | 1.184786 | -0.041259 | -1.809169 |
| H | 3.368839 | -0.049186 | -0.595466 |
| H | 3.408057 | -0.021953 | 1.903008  |
| H | 1.280577 | 0.002967  | 3.182681  |

### B3

|    |           |           |           |
|----|-----------|-----------|-----------|
| C  | 0.916319  | 1.229162  | 0.955619  |
| C  | 0.232209  | 0.036227  | 1.293620  |
| C  | 0.980026  | -1.164079 | 1.369183  |
| C  | 2.355477  | -1.174649 | 1.097062  |
| C  | 3.015628  | 0.016540  | 0.752952  |
| C  | 2.291916  | 1.218448  | 0.683843  |
| Si | -1.611970 | 0.059451  | 1.736351  |
| Si | -3.211754 | 1.229173  | 0.597065  |
| C  | -3.956203 | 2.845189  | 1.209487  |
| C  | -5.239550 | 3.254460  | 0.766627  |
| C  | -5.801576 | 4.457965  | 1.213898  |
| C  | -5.091191 | 5.276792  | 2.107856  |
| C  | -3.817167 | 4.888620  | 2.556604  |
| C  | -3.255383 | 3.684141  | 2.112313  |
| Si | -4.512392 | -0.316410 | -0.523951 |
| Si | -3.153676 | -1.442111 | 0.966046  |
| C  | -3.834618 | -2.864912 | 1.990814  |
| C  | -5.107741 | -3.415055 | 1.695265  |
| C  | -5.621987 | -4.476243 | 2.452798  |
| C  | -4.873454 | -5.010266 | 3.515221  |
| C  | -3.608865 | -4.479183 | 3.821759  |
| C  | -3.094800 | -3.416069 | 3.067329  |
| C  | -6.347010 | -0.296599 | 0.073378  |
| C  | -6.723576 | -0.005070 | 1.408681  |
| C  | -8.069278 | -0.011958 | 1.801776  |
| C  | -9.075578 | -0.312992 | 0.867900  |
| C  | -8.727479 | -0.604245 | -0.459968 |
| C  | -7.378061 | -0.593799 | -0.850132 |
| H  | 0.479947  | -2.101045 | 1.630431  |
| H  | 2.911566  | -2.113752 | 1.149169  |
| H  | 4.086618  | 0.008048  | 0.538810  |
| H  | 2.798471  | 2.147942  | 0.413050  |
| H  | 0.365866  | 2.171891  | 0.891006  |
| H  | -5.805602 | 2.616888  | 0.084061  |
| H  | -6.794494 | 4.755398  | 0.869306  |
| H  | -5.530165 | 6.214366  | 2.456554  |
| H  | -3.265817 | 5.522488  | 3.254869  |
| H  | -2.268735 | 3.383137  | 2.474470  |
| H  | -5.703519 | -2.996607 | 0.881156  |
| H  | -6.607939 | -4.883550 | 2.218129  |
| H  | -5.275554 | -5.836906 | 4.105435  |
| H  | -3.027913 | -4.891107 | 4.650105  |
| H  | -2.115249 | -3.000430 | 3.318529  |

|   |            |           |           |
|---|------------|-----------|-----------|
| H | -7.124535  | -0.821532 | -1.890240 |
| H | -9.504716  | -0.838164 | -1.191749 |
| H | -10.124144 | -0.320011 | 1.174596  |
| H | -8.333613  | 0.215626  | 2.837472  |
| H | -5.954139  | 0.229591  | 2.148245  |

#### **B4**

|    |           |           |           |
|----|-----------|-----------|-----------|
| C  | 0.001338  | 0.208039  | 0.220735  |
| C  | -0.013753 | -0.021862 | 1.620236  |
| C  | 1.200057  | -0.449509 | 2.212536  |
| C  | 2.366648  | -0.640904 | 1.452477  |
| C  | 2.350871  | -0.405733 | 0.069591  |
| C  | 1.161492  | 0.021278  | -0.544228 |
| Si | -1.534143 | 0.165358  | 2.861202  |
| Si | -3.205508 | -0.619052 | 1.360688  |
| C  | -3.018420 | -1.944224 | 0.040678  |
| C  | -3.980396 | -2.118161 | -0.984838 |
| C  | -3.801150 | -3.093422 | -1.975195 |
| C  | -2.656608 | -3.908949 | -1.958528 |
| C  | -1.691486 | -3.746979 | -0.950965 |
| C  | -1.870349 | -2.775084 | 0.043509  |
| Si | -4.772487 | 0.970750  | 1.392991  |
| Si | -2.731567 | 1.835744  | 1.661397  |
| C  | -2.033486 | 3.269110  | 0.664106  |
| C  | -2.824485 | 3.978627  | -0.273267 |
| C  | -2.270926 | 5.017114  | -1.034424 |
| C  | -0.917990 | 5.362214  | -0.873194 |
| C  | -0.119322 | 4.667161  | 0.049672  |
| C  | -0.671685 | 3.630366  | 0.815151  |
| C  | -6.263488 | 1.411292  | 0.344124  |
| C  | -7.069696 | 0.400484  | -0.238291 |
| C  | -8.156261 | 0.735172  | -1.057946 |
| C  | -8.468343 | 2.083254  | -1.302071 |
| C  | -7.691449 | 3.097209  | -0.716735 |
| C  | -6.603953 | 2.766835  | 0.103429  |
| H  | 1.234999  | -0.637986 | 3.290440  |
| H  | 3.286138  | -0.972623 | 1.941842  |
| H  | 3.255452  | -0.553055 | -0.525278 |
| H  | 1.135949  | 0.206962  | -1.621122 |
| H  | -0.907108 | 0.537028  | -0.290707 |
| H  | -3.873208 | 3.705984  | -0.415681 |
| H  | -2.890659 | 5.553702  | -1.756508 |
| H  | -0.486685 | 6.169977  | -1.468833 |
| H  | 0.933744  | 4.930171  | 0.170841  |
| H  | -0.041262 | 3.084217  | 1.519716  |
| H  | -4.865098 | -1.477227 | -1.013450 |
| H  | -4.549011 | -3.214952 | -2.762206 |
| H  | -2.516188 | -4.667201 | -2.732254 |
| H  | -0.798079 | -4.375071 | -0.941497 |

|   |           |           |           |
|---|-----------|-----------|-----------|
| H | -1.107756 | -2.642902 | 0.813427  |
| H | -6.012241 | 3.564762  | 0.559103  |
| H | -7.935074 | 4.146734  | -0.896657 |
| H | -9.316370 | 2.342134  | -1.939464 |
| H | -8.762230 | -0.056569 | -1.504270 |
| H | -6.842767 | -0.651791 | -0.049449 |

## B5

|    |           |           |           |
|----|-----------|-----------|-----------|
| C  | 2.512057  | -1.324489 | 2.109086  |
| C  | 1.860583  | -0.116313 | 1.761373  |
| C  | 2.656068  | 1.025252  | 1.504293  |
| C  | 4.053746  | 0.956736  | 1.571075  |
| C  | 4.683397  | -0.251715 | 1.912136  |
| C  | 3.910496  | -1.392522 | 2.183998  |
| Si | -0.030808 | -0.058224 | 1.599295  |
| Si | -1.144129 | -1.199996 | -0.041082 |
| C  | -2.144741 | -2.790265 | -0.114038 |
| C  | -2.548083 | -3.446751 | 1.073969  |
| C  | -3.300210 | -4.628864 | 1.017393  |
| C  | -3.662122 | -5.175197 | -0.225077 |
| C  | -3.269415 | -4.535246 | -1.412224 |
| C  | -2.517559 | -3.352816 | -1.358883 |
| Si | -1.144099 | 1.200016  | 0.041084  |
| Si | -0.030803 | 0.058217  | -1.599291 |
| C  | 1.860589  | 0.116268  | -1.761368 |
| C  | 2.512082  | 1.324434  | -2.109080 |
| C  | 3.910524  | 1.392444  | -2.183992 |
| C  | 4.683404  | 0.251624  | -1.912133 |
| C  | 4.053733  | -0.956817 | -1.571074 |
| C  | 2.656054  | -1.025310 | -1.504291 |
| C  | -2.144674 | 2.790309  | 0.114037  |
| C  | -2.547974 | 3.446817  | -1.073972 |
| C  | -3.300073 | 4.628949  | -1.017401 |
| C  | -3.661995 | 5.175279  | 0.225067  |
| C  | -3.269328 | 4.535307  | 1.412217  |
| C  | -2.517500 | 3.352859  | 1.358879  |
| H  | 1.919604  | 2.222409  | -2.308674 |
| H  | 4.397905  | 2.334589  | -2.446891 |
| H  | 5.773451  | 0.304754  | -1.962126 |
| H  | 4.653322  | -1.841075 | -1.344641 |
| H  | 2.176194  | -1.965849 | -1.221360 |
| H  | 2.176224  | 1.965799  | 1.221359  |
| H  | 4.653350  | 1.840983  | 1.344640  |
| H  | 5.773443  | -0.304864 | 1.962129  |
| H  | 4.397862  | -2.334675 | 2.446898  |
| H  | 1.919562  | -2.222453 | 2.308683  |
| H  | -2.268169 | -3.029968 | 2.044807  |
| H  | -3.602452 | -5.124734 | 1.942775  |
| H  | -4.246685 | -6.096922 | -0.268072 |

H -3.547559 -4.958282 -2.380338  
H -2.214169 -2.862716 -2.287372  
H -2.214142 2.862743 2.287370  
H -3.547480 4.958341 2.380329  
H -4.246536 6.097019 0.268058  
H -3.602283 5.124836 -1.942784  
H -2.268052 3.030036 -2.044808

## **B6**

Si -0.373870 -0.990591 1.207388  
Si 0.373662 -1.207955 -0.990714  
Si -0.373923 0.990280 -1.207776  
Si 0.374164 1.207192 0.990081  
C 2.259094 -1.372737 -0.984020  
C 2.259390 1.372686 0.983827  
C -2.259285 0.984056 -1.372473  
C -2.259208 -0.983917 1.372605  
C -2.873597 0.229436 -2.403424  
C -4.266418 0.217744 -2.558944  
C -5.076437 0.960327 -1.684732  
C -4.486556 1.718276 -0.660037  
C -3.093920 1.735893 -0.510472  
H -2.253454 -0.363286 -3.081598  
H -4.720299 -0.375722 -3.356310  
H -6.162706 0.947315 -1.799917  
H -5.113609 2.286282 0.030502  
H -2.648697 2.319774 0.298316  
C -3.094017 -1.735579 0.510592  
C -4.486637 -1.717827 0.660292  
C -5.076328 -0.959975 1.685173  
C -4.266134 -0.217580 2.559375  
C -2.873335 -0.229349 2.403679  
H -2.648952 -2.319362 -0.298351  
H -5.113826 -2.285644 -0.030280  
H -6.162582 -0.946868 1.800493  
H -4.719860 0.375819 3.356881  
H -2.253052 0.363241 3.081844  
C 2.873560 2.403856 0.229406  
C 4.266345 2.559589 0.217779  
C 5.076499 1.685314 0.960143  
C 4.486775 0.660364 1.717868  
C 3.094151 0.510663 1.735534  
H 2.253301 3.082066 -0.363151  
H 4.720113 3.357144 -0.375516  
H 6.162753 1.800642 0.947107  
H 5.113940 -0.030232 2.285681  
H 2.649039 -0.298316 2.319229  
C 3.093847 -0.510998 -1.736014  
C 4.486489 -0.660562 -1.718147

C 5.076258 -1.685045 -0.959833  
C 4.266107 -2.559031 -0.217130  
C 2.873292 -2.403486 -0.229037  
H 2.648739 0.297648 -2.320182  
H 5.113620 0.029796 -2.286294  
H 6.162523 -1.800243 -0.946641  
H 4.719887 -3.356228 0.376645  
H 2.253060 -3.081499 0.363774

**B7**

C -0.009340 4.742062 1.183771  
C -0.038809 3.488912 0.522911  
C -0.472489 3.459769 -0.826858  
C -0.863543 4.633497 -1.485131  
C -0.811145 5.868579 -0.815885  
C -0.378619 5.922505 0.518821  
Si 0.460803 1.926884 1.519287  
Si 1.651201 0.593265 0.002820  
C 3.431648 1.209381 -0.084330  
C 4.528191 0.338044 -0.318000  
C 5.832418 0.839239 -0.427498  
C 6.071505 2.219351 -0.316658  
C 4.998635 3.101546 -0.098784  
C 3.694964 2.603529 0.015002  
Si 1.296805 -1.687770 0.068801  
Si -0.687409 -2.133098 -1.016868  
Si -1.980569 -3.570720 0.295424  
C -3.661355 -2.622494 -0.010939  
C -4.206877 -1.674702 0.889017  
C -5.406380 -1.002494 0.605750  
C -6.104680 -1.270266 -0.583271  
C -5.601870 -2.232648 -1.474538  
C -4.402649 -2.901945 -1.185968  
C 2.832206 -2.790704 0.071959  
C 3.270222 -3.429720 -1.110889  
C 4.462588 -4.170087 -1.128434  
C 5.234931 -4.285590 0.038458  
C 4.808234 -3.665309 1.224927  
C 3.617450 -2.925055 1.241431  
Si -0.477870 -2.075625 1.571355  
C -1.273811 -0.403985 2.132638  
C -1.630218 0.701308 1.284917  
C -2.434668 1.774082 1.766614  
C -2.794218 1.831571 3.113991  
C -2.373882 0.802125 3.979227  
C -1.635573 -0.289821 3.497397  
C -1.181137 -0.568273 -1.990544  
C -2.504028 -0.048967 -2.010245  
C -2.831680 1.063168 -2.798100

|   |           |           |           |
|---|-----------|-----------|-----------|
| C | -1.860803 | 1.675649  | -3.611341 |
| C | -0.550413 | 1.175500  | -3.618120 |
| C | -0.214820 | 0.072437  | -2.813483 |
| H | 0.305170  | 4.795294  | 2.230645  |
| H | -0.339133 | 6.880038  | 1.043631  |
| H | -1.108196 | 6.784759  | -1.331618 |
| H | -1.199980 | 4.581918  | -2.523151 |
| H | -0.509808 | 2.511630  | -1.363334 |
| H | 4.360732  | -0.735733 | -0.408329 |
| H | 6.663173  | 0.151196  | -0.600043 |
| H | 7.088882  | 2.607424  | -0.403920 |
| H | 5.180134  | 4.175633  | -0.016864 |
| H | 2.869496  | 3.304014  | 0.171835  |
| H | 2.672119  | -3.348257 | -2.022321 |
| H | 4.785764  | -4.659060 | -2.050406 |
| H | 6.162829  | -4.861914 | 0.025747  |
| H | 5.402603  | -3.760312 | 2.136662  |
| H | 3.292965  | -2.445933 | 2.168744  |
| H | -1.360455 | -1.088461 | 4.191812  |
| H | -2.639081 | 0.845763  | 5.038450  |
| H | -3.392737 | 2.661536  | 3.493266  |
| H | -2.730325 | 2.561163  | 1.071971  |
| H | -1.521376 | 0.598085  | 0.204517  |
| H | -3.680169 | -1.437528 | 1.814794  |
| H | -5.791213 | -0.263456 | 1.313721  |
| H | -7.034558 | -0.742552 | -0.808373 |
| H | -6.139229 | -2.455524 | -2.400062 |
| H | -4.021322 | -3.635709 | -1.902917 |
| H | -3.274887 | -0.506754 | -1.393462 |
| H | 0.804038  | -0.320396 | -2.857799 |
| H | 0.213481  | 1.639858  | -4.246324 |
| H | -2.126691 | 2.531399  | -4.236242 |
| H | -3.853573 | 1.449638  | -2.779000 |

### **B8**

|    |           |           |           |
|----|-----------|-----------|-----------|
| Si | -0.123988 | -1.622688 | 0.128116  |
| Si | -1.474570 | -0.147343 | -1.125902 |
| Si | -1.444975 | 0.011803  | 1.172744  |
| Si | -0.277917 | 1.604167  | -0.121966 |
| Si | 2.001446  | 1.164207  | -0.322244 |
| Si | 2.109842  | -0.972797 | 0.254283  |
| C  | -2.536877 | -0.302580 | -2.632523 |
| C  | -2.468792 | 0.069951  | 2.712523  |
| C  | -0.992303 | 3.303040  | -0.283154 |
| C  | 3.331299  | 2.397259  | 0.043240  |
| C  | 3.536474  | -2.077961 | -0.152941 |
| C  | -0.672027 | -3.380356 | 0.309107  |
| C  | 4.831754  | -1.723503 | 0.242799  |
| C  | 5.911368  | -2.559843 | -0.065371 |

|   |           |           |           |
|---|-----------|-----------|-----------|
| C | 5.695703  | -3.750641 | -0.769280 |
| C | 4.400423  | -4.105098 | -1.165020 |
| C | 3.320809  | -3.268759 | -0.856851 |
| H | 4.999511  | -0.797232 | 0.790340  |
| H | 6.918911  | -2.284125 | 0.242458  |
| H | 6.535489  | -4.401194 | -1.008992 |
| H | 4.232666  | -5.031369 | -1.712561 |
| H | 2.313266  | -3.544477 | -1.164680 |
| C | 3.533012  | 3.484463  | -0.815421 |
| C | 4.539386  | 4.417582  | -0.538839 |
| C | 5.344048  | 4.263498  | 0.596405  |
| C | 5.142335  | 3.176294  | 1.455066  |
| C | 4.135960  | 2.243175  | 1.178484  |
| H | 2.907101  | 3.604318  | -1.698479 |
| H | 4.696291  | 5.263271  | -1.206754 |
| H | 6.126864  | 4.989332  | 0.811547  |
| H | 5.768246  | 3.056438  | 2.338124  |
| H | 3.979055  | 1.397485  | 1.846400  |
| C | -2.031807 | -3.702067 | 0.222508  |
| C | -2.446539 | -5.032194 | 0.359475  |
| C | -1.501490 | -6.040610 | 0.583040  |
| C | -0.141710 | -5.718898 | 0.669639  |
| C | 0.273022  | -4.388771 | 0.532673  |
| H | -2.766920 | -2.917664 | 0.048606  |
| H | -3.504254 | -5.282440 | 0.292113  |
| H | -1.824092 | -7.075259 | 0.689580  |
| H | 0.593403  | -6.503301 | 0.843541  |
| H | 1.330737  | -4.138526 | 0.600035  |
| C | -3.222654 | 0.814781  | -3.123656 |
| C | -4.026562 | 0.697304  | -4.263802 |
| C | -4.144692 | -0.537536 | -4.912814 |
| C | -3.458915 | -1.654898 | -4.421680 |
| C | -2.655006 | -1.537420 | -3.281535 |
| H | -3.130765 | 1.775310  | -2.618817 |
| H | -4.559998 | 1.566451  | -4.645833 |
| H | -4.770017 | -0.628917 | -5.799684 |
| H | -3.550803 | -2.615426 | -4.926519 |
| H | -2.121570 | -2.406567 | -2.899503 |
| C | -3.152051 | 1.242939  | 3.054950  |
| C | -3.926831 | 1.286942  | 4.220188  |
| C | -4.018353 | 0.157957  | 5.042998  |
| C | -3.335094 | -1.015031 | 4.700571  |
| C | -2.560314 | -1.059034 | 3.535333  |
| H | -3.080859 | 2.121128  | 2.414921  |
| H | -4.458308 | 2.199359  | 4.486547  |
| H | -4.621021 | 0.192186  | 5.949387  |
| H | -3.406286 | -1.893220 | 5.340600  |
| H | -2.028837 | -1.971451 | 3.268974  |
| C | -2.372482 | 3.497424  | -0.151551 |



|   |           |          |           |
|---|-----------|----------|-----------|
| C | -2.913098 | 4.783058 | -0.273532 |
| C | -2.073535 | 5.874309 | -0.527115 |
| C | -0.693355 | 5.679925 | -0.658719 |
| C | -0.152740 | 4.394291 | -0.536738 |
| H | -3.025543 | 2.648586 | 0.045701  |
| H | -3.986681 | 4.934260 | -0.171163 |
| H | -2.494057 | 6.874348 | -0.621999 |
| H | -0.040295 | 6.528762 | -0.855971 |
| H | 0.920843  | 4.243089 | -0.639107 |

### B7-TS

|    |           |           |           |
|----|-----------|-----------|-----------|
| C  | 2.056217  | 4.022750  | 0.591161  |
| C  | 1.046965  | 3.368028  | -0.152823 |
| C  | 0.648066  | 3.933442  | -1.385497 |
| C  | 1.239640  | 5.114711  | -1.858267 |
| C  | 2.240290  | 5.753135  | -1.106993 |
| C  | 2.646338  | 5.205368  | 0.120219  |
| Si | 0.287048  | 1.759377  | 0.514689  |
| Si | 1.715205  | 0.243671  | 1.743083  |
| C  | 3.473108  | 0.612271  | 0.766792  |
| C  | 3.730219  | 1.365840  | -0.419735 |
| C  | 5.040702  | 1.581437  | -0.886061 |
| C  | 6.132528  | 1.053564  | -0.186246 |
| C  | 5.913870  | 0.296466  | 0.982603  |
| C  | 4.613456  | 0.074562  | 1.440942  |
| Si | -0.528186 | 0.272113  | -1.132521 |
| Si | -2.022714 | 1.710075  | 0.459125  |
| C  | -2.976206 | 0.965114  | 1.907369  |
| C  | -4.213079 | 0.294849  | 1.725071  |
| C  | -4.836137 | -0.352387 | 2.800310  |
| C  | -4.241789 | -0.342707 | 4.074151  |
| C  | -3.020737 | 0.322294  | 4.273294  |
| C  | -2.396475 | 0.976095  | 3.201082  |
| Si | -2.517856 | 1.348508  | -1.752615 |
| C  | -4.124479 | 0.308123  | -1.833988 |
| C  | -4.112226 | -1.105284 | -1.930911 |
| C  | -5.308006 | -1.837831 | -1.906204 |
| C  | -6.543123 | -1.177036 | -1.795982 |
| C  | -6.576861 | 0.225049  | -1.722321 |
| C  | -5.380542 | 0.958517  | -1.750158 |
| C  | -0.836756 | -1.563447 | -0.654107 |
| C  | -1.454223 | -1.965150 | 0.556619  |
| C  | -1.683406 | -3.319323 | 0.835826  |
| C  | -1.328068 | -4.307424 | -0.099579 |
| C  | -0.726280 | -3.933509 | -1.310817 |
| C  | -0.474014 | -2.578106 | -1.578241 |
| Si | 2.072576  | -0.935019 | -0.234163 |
| C  | 3.151960  | -2.499793 | -0.253434 |
| C  | 2.569604  | -3.726018 | 0.153831  |

|   |           |           |           |
|---|-----------|-----------|-----------|
| C | 3.300512  | -4.921355 | 0.086258  |
| C | 4.621102  | -4.914290 | -0.392666 |
| C | 5.208106  | -3.706946 | -0.809129 |
| C | 4.477881  | -2.511815 | -0.749769 |
| H | 4.943118  | -1.579300 | -1.076773 |
| H | 6.235250  | -3.698386 | -1.182453 |
| H | 5.189861  | -5.845653 | -0.443931 |
| H | 2.840953  | -5.857741 | 0.412445  |
| H | 1.543115  | -3.746549 | 0.529113  |
| H | 2.901850  | 1.802942  | -0.974699 |
| H | 5.197209  | 2.163051  | -1.797110 |
| H | 7.149940  | 1.223847  | -0.545511 |
| H | 6.761576  | -0.123075 | 1.529096  |
| H | 4.461172  | -0.531547 | 2.338136  |
| H | 2.396033  | 3.595763  | 1.538103  |
| H | 3.426645  | 5.694011  | 0.708539  |
| H | 2.702046  | 6.671447  | -1.477136 |
| H | 0.920224  | 5.534989  | -2.814989 |
| H | -0.130039 | 3.447438  | -1.980252 |
| H | 0.015468  | -2.303905 | -2.516805 |
| H | -0.440072 | -4.693283 | -2.041415 |
| H | -1.517740 | -5.361229 | 0.116702  |
| H | -2.146359 | -3.602167 | 1.784099  |
| H | -1.755850 | -1.215965 | 1.287396  |
| H | -3.163348 | -1.639551 | -1.998313 |
| H | -5.273203 | -2.928550 | -1.964534 |
| H | -7.472786 | -1.750372 | -1.773365 |
| H | -7.533465 | 0.747467  | -1.643432 |
| H | -5.422442 | 2.049800  | -1.687030 |
| H | -4.675688 | 0.261071  | 0.738626  |
| H | -1.441463 | 1.483175  | 3.362579  |
| H | -2.553574 | 0.329562  | 5.260677  |
| H | -4.728323 | -0.852883 | 4.908671  |
| H | -5.784051 | -0.871722 | 2.641590  |

### **B8-TS**

|    |           |           |           |
|----|-----------|-----------|-----------|
| C  | -3.765371 | -2.516074 | -1.156692 |
| C  | -2.798533 | -2.052247 | -2.081159 |
| C  | -3.217219 | -1.800955 | -3.410770 |
| C  | -4.555929 | -1.974610 | -3.793591 |
| C  | -5.504648 | -2.412593 | -2.854009 |
| C  | -5.105062 | -2.687877 | -1.535733 |
| Si | -0.992150 | -1.679591 | -1.542884 |
| Si | -1.034245 | 0.572395  | -0.801401 |
| C  | -2.685791 | 1.403047  | -0.382464 |
| C  | -2.766733 | 2.321556  | 0.693557  |
| C  | -3.993715 | 2.884304  | 1.071995  |
| C  | -5.169302 | 2.535719  | 0.385881  |
| C  | -5.108025 | 1.630496  | -0.685465 |

|    |           |           |           |
|----|-----------|-----------|-----------|
| C  | -3.878400 | 1.074253  | -1.071506 |
| Si | -0.680933 | -1.317083 | 0.703309  |
| C  | -1.506860 | -1.084210 | 2.381417  |
| C  | -0.798383 | -1.277661 | 3.590652  |
| C  | -1.430914 | -1.085155 | 4.827731  |
| C  | -2.780781 | -0.699734 | 4.876796  |
| C  | -3.497510 | -0.507528 | 3.683675  |
| C  | -2.869640 | -0.700455 | 2.445491  |
| Si | 1.542955  | -1.530402 | 0.155325  |
| C  | 2.426333  | -3.192204 | 0.243558  |
| C  | 1.906807  | -4.343881 | -0.396399 |
| C  | 2.569964  | -5.575628 | -0.306888 |
| C  | 3.767833  | -5.683746 | 0.419423  |
| C  | 4.297688  | -4.553057 | 1.060948  |
| C  | 3.633518  | -3.320186 | 0.974969  |
| Si | 2.580841  | 0.465445  | 0.234679  |
| C  | 4.313879  | 0.829346  | -0.426839 |
| C  | 5.305245  | -0.182842 | -0.441806 |
| C  | 6.596800  | 0.080459  | -0.920562 |
| C  | 6.931016  | 1.363953  | -1.381987 |
| C  | 5.962548  | 2.381637  | -1.369380 |
| C  | 4.668649  | 2.117484  | -0.899309 |
| Si | 0.845900  | 1.767393  | -0.426691 |
| C  | 0.820631  | 3.630933  | -0.216089 |
| C  | 1.875002  | 4.314282  | 0.442428  |
| C  | 1.849838  | 5.707636  | 0.589737  |
| C  | 0.766896  | 6.449062  | 0.087520  |
| C  | -0.290888 | 5.789866  | -0.561607 |
| C  | -0.265042 | 4.397221  | -0.713660 |
| H  | 0.983098  | -4.268133 | -0.975113 |
| H  | 2.154867  | -6.451459 | -0.810997 |
| H  | 4.285016  | -6.643591 | 0.484241  |
| H  | 5.225598  | -4.630190 | 1.632511  |
| H  | 4.048858  | -2.453075 | 1.495228  |
| H  | 5.061807  | -1.189580 | -0.094098 |
| H  | 7.342423  | -0.718114 | -0.934100 |
| H  | 7.938046  | 1.569377  | -1.751789 |
| H  | 6.212855  | 3.380856  | -1.733790 |
| H  | 3.925080  | 2.918156  | -0.910879 |
| H  | 2.715425  | 3.748370  | 0.852693  |
| H  | 2.670538  | 6.214648  | 1.102355  |
| H  | 0.745321  | 7.534692  | 0.205623  |
| H  | -1.137853 | 6.361476  | -0.947886 |
| H  | -1.098878 | 3.897115  | -1.211315 |
| H  | -1.863199 | 2.587158  | 1.246701  |
| H  | -4.033413 | 3.585889  | 1.908632  |
| H  | -6.127209 | 2.967356  | 0.685762  |
| H  | -6.017051 | 1.353985  | -1.224825 |
| H  | -3.851113 | 0.369554  | -1.902984 |

|   |           |           |           |
|---|-----------|-----------|-----------|
| H | 0.253567  | -1.574171 | 3.562706  |
| H | -0.869989 | -1.234834 | 5.753355  |
| H | -3.271811 | -0.549533 | 5.840996  |
| H | -4.545450 | -0.200448 | 3.715244  |
| H | -3.434485 | -0.532743 | 1.526452  |
| H | -2.493304 | -1.442562 | -4.148673 |
| H | -4.860647 | -1.764286 | -4.821810 |
| H | -6.548376 | -2.542570 | -3.149372 |
| H | -5.838561 | -3.030154 | -0.801520 |
| H | -3.467717 | -2.721051 | -0.125276 |

### **B9**

|    |           |           |           |
|----|-----------|-----------|-----------|
| C  | 0.641275  | -1.749454 | 3.200038  |
| C  | 1.405201  | -1.387987 | 2.064405  |
| C  | 2.737192  | -0.945225 | 2.262960  |
| C  | 3.277734  | -0.859951 | 3.553355  |
| C  | 2.503896  | -1.217456 | 4.670119  |
| C  | 1.183763  | -1.662234 | 4.490511  |
| Si | 0.671183  | -1.498521 | 0.324476  |
| Si | 1.289183  | -1.635722 | -1.909330 |
| C  | 3.210122  | -1.800131 | -1.997687 |
| C  | 3.868313  | -1.429322 | -3.197439 |
| C  | 5.266312  | -1.477315 | -3.308644 |
| C  | 6.042714  | -1.912013 | -2.221369 |
| C  | 5.410642  | -2.313016 | -1.032831 |
| C  | 4.012488  | -2.264057 | -0.927016 |
| Si | 1.100489  | 0.550172  | -0.927175 |
| C  | 2.633748  | 1.439508  | -0.241190 |
| C  | 2.549482  | 2.171413  | 0.970102  |
| C  | 3.684391  | 2.768358  | 1.535837  |
| C  | 4.933867  | 2.642319  | 0.905657  |
| C  | 5.037595  | 1.923645  | -0.295519 |
| C  | 3.899345  | 1.332927  | -0.866327 |
| Si | -0.796788 | 1.720882  | -0.543913 |
| Si | -2.530970 | 0.436016  | 0.121792  |
| C  | -4.334912 | 0.877240  | -0.197837 |
| C  | -4.691084 | 2.016512  | -0.961026 |
| C  | -6.037058 | 2.341518  | -1.182504 |
| C  | -7.055380 | 1.534501  | -0.648685 |
| C  | -6.721207 | 0.403507  | 0.114541  |
| C  | -5.375712 | 0.082392  | 0.344032  |
| C  | -0.808025 | 3.577431  | -0.282407 |
| C  | 0.320558  | 4.363359  | -0.630261 |
| C  | 0.317319  | 5.750286  | -0.432009 |
| C  | -0.813775 | 6.383250  | 0.110972  |
| C  | -1.942761 | 5.621762  | 0.458345  |
| C  | -1.940141 | 4.233946  | 0.265551  |
| Si | -1.628613 | -1.590267 | 0.083892  |
| C  | -2.565565 | -3.202415 | -0.064216 |

|   |           |           |           |
|---|-----------|-----------|-----------|
| C | -3.910308 | -3.231404 | -0.515941 |
| C | -4.602106 | -4.443905 | -0.628346 |
| C | -3.963850 | -5.653282 | -0.301775 |
| C | -2.629960 | -5.644885 | 0.138593  |
| C | -1.938685 | -4.431812 | 0.260576  |
| H | 1.209328  | 3.881986  | -1.043550 |
| H | 1.198580  | 6.337846  | -0.699088 |
| H | -0.815259 | 7.464771  | 0.263986  |
| H | -2.823260 | 6.109407  | 0.883144  |
| H | -2.824452 | 3.654797  | 0.543795  |
| H | -3.910067 | 2.648649  | -1.390672 |
| H | -6.291019 | 3.221352  | -1.778169 |
| H | -8.103364 | 1.786378  | -0.825042 |
| H | -7.508729 | -0.225319 | 0.536387  |
| H | -5.130480 | -0.795304 | 0.947750  |
| H | -4.412248 | -2.299392 | -0.786208 |
| H | -5.636954 | -4.448053 | -0.978335 |
| H | -4.503768 | -6.598426 | -0.392282 |
| H | -2.130086 | -6.582990 | 0.390057  |
| H | -0.901535 | -4.436566 | 0.606745  |
| H | 4.004852  | 0.769519  | -1.793446 |
| H | 6.005165  | 1.816602  | -0.791405 |
| H | 5.820882  | 3.099721  | 1.350509  |
| H | 3.595038  | 3.321157  | 2.473960  |
| H | 1.589355  | 2.259590  | 1.483156  |
| H | 3.278937  | -1.077430 | -4.050021 |
| H | 5.750021  | -1.174986 | -4.241018 |
| H | 7.131637  | -1.946063 | -2.303110 |
| H | 6.007805  | -2.658066 | -0.184939 |
| H | 3.538460  | -2.571854 | 0.007886  |
| H | 3.347688  | -0.648049 | 1.409568  |
| H | -0.388101 | -2.097186 | 3.072704  |
| H | 0.576685  | -1.941194 | 5.355142  |
| H | 2.927211  | -1.150154 | 5.674996  |
| H | 4.302339  | -0.504618 | 3.685713  |

### **B9-TS**

|    |           |           |           |
|----|-----------|-----------|-----------|
| C  | -3.156946 | -2.248087 | 1.011937  |
| C  | -2.251933 | -2.618256 | -0.011868 |
| C  | -2.434080 | -3.872188 | -0.644824 |
| C  | -3.482664 | -4.724762 | -0.266592 |
| C  | -4.366389 | -4.342152 | 0.755733  |
| C  | -4.198519 | -3.103547 | 1.396879  |
| Si | -0.899740 | -1.410783 | -0.558457 |
| Si | -1.890658 | 0.450372  | -1.519606 |
| C  | -3.791582 | 0.450417  | -1.610167 |
| C  | -4.550759 | -0.741737 | -1.714892 |
| C  | -5.946129 | -0.697457 | -1.845992 |
| C  | -6.615476 | 0.536512  | -1.894160 |

|    |           |           |           |
|----|-----------|-----------|-----------|
| C  | -5.879001 | 1.730589  | -1.822726 |
| C  | -4.483686 | 1.686149  | -1.690393 |
| Si | -0.877582 | 1.535176  | 0.168071  |
| C  | -1.709725 | 2.714541  | 1.382617  |
| C  | -3.114055 | 2.916524  | 1.378320  |
| C  | -3.724574 | 3.748379  | 2.326124  |
| C  | -2.948374 | 4.391227  | 3.305624  |
| C  | -1.558490 | 4.191220  | 3.339224  |
| C  | -0.947800 | 3.358853  | 2.391183  |
| Si | 1.207205  | -2.181799 | -0.872763 |
| C  | 1.722047  | -3.549832 | 0.360050  |
| C  | 2.979852  | -3.511040 | 1.011286  |
| C  | 3.378024  | -4.540394 | 1.876490  |
| C  | 2.527359  | -5.631502 | 2.118358  |
| C  | 1.278566  | -5.689396 | 1.479361  |
| C  | 0.886631  | -4.667350 | 0.602015  |
| Si | 2.368244  | -0.225716 | -0.555724 |
| C  | 4.245131  | -0.370034 | -0.598446 |
| C  | 4.858798  | -1.359308 | -1.409234 |
| C  | 6.253075  | -1.498368 | -1.451385 |
| C  | 7.069141  | -0.653158 | -0.681388 |
| C  | 6.481783  | 0.328662  | 0.134582  |
| C  | 5.087765  | 0.466158  | 0.178282  |
| Si | 1.441054  | 1.624339  | 0.260486  |
| C  | 2.114437  | 3.334309  | -0.235076 |
| C  | 1.357426  | 4.516171  | -0.038808 |
| C  | 1.871740  | 5.774312  | -0.386553 |
| C  | 3.157320  | 5.885692  | -0.938223 |
| C  | 3.922646  | 4.725304  | -1.142790 |
| C  | 3.409423  | 3.468000  | -0.796400 |
| H  | -0.087557 | -4.735512 | 0.114616  |
| H  | 0.607955  | -6.533228 | 1.660491  |
| H  | 2.836131  | -6.430298 | 2.796691  |
| H  | 4.352456  | -4.485344 | 2.368295  |
| H  | 3.654332  | -2.668779 | 0.843786  |
| H  | 4.644924  | 1.222645  | 0.830506  |
| H  | 7.110273  | 0.982080  | 0.744246  |
| H  | 8.155464  | -0.762592 | -0.712119 |
| H  | 6.702725  | -2.266691 | -2.084569 |
| H  | 4.236331  | -2.026160 | -2.012466 |
| H  | 4.019861  | 2.581174  | -0.976780 |
| H  | 4.921607  | 4.797316  | -1.579992 |
| H  | 3.557720  | 6.864905  | -1.210175 |
| H  | 1.262666  | 6.667848  | -0.228445 |
| H  | 0.353081  | 4.459548  | 0.385320  |
| H  | 0.132963  | 3.200436  | 2.438353  |
| H  | -0.951628 | 4.679606  | 4.104816  |
| H  | -3.425894 | 5.038428  | 4.044701  |
| H  | -4.807259 | 3.892331  | 2.303818  |

|   |           |           |           |
|---|-----------|-----------|-----------|
| H | -3.733274 | 2.411846  | 0.635677  |
| H | -4.053125 | -1.710948 | -1.677589 |
| H | -6.510963 | -1.630529 | -1.908254 |
| H | -7.702464 | 0.568176  | -1.997165 |
| H | -6.389652 | 2.695063  | -1.876082 |
| H | -3.923659 | 2.624858  | -1.648499 |
| H | -3.052426 | -1.276371 | 1.501725  |
| H | -4.884474 | -2.800481 | 2.191073  |
| H | -5.183217 | -5.005014 | 1.049600  |
| H | -3.610159 | -5.685394 | -0.771037 |
| H | -1.757969 | -4.177872 | -1.447541 |

### **B10**

|    |           |           |           |
|----|-----------|-----------|-----------|
| Si | -2.208010 | 0.001625  | 0.226719  |
| Si | -1.102598 | -1.913005 | -0.226719 |
| Si | 1.102598  | -1.913005 | 0.226719  |
| Si | 2.208010  | 0.001625  | -0.226719 |
| Si | 1.105412  | 1.911380  | 0.226719  |
| Si | -1.105412 | 1.911380  | -0.226719 |
| C  | -2.024740 | 3.550398  | -0.000922 |
| C  | 2.024740  | 3.550398  | 0.000922  |
| C  | 4.087105  | -0.021723 | -0.000922 |
| C  | 2.062365  | -3.528675 | 0.000922  |
| C  | -2.062365 | -3.528675 | -0.000922 |
| C  | -4.087105 | -0.021723 | 0.000922  |
| C  | 4.860211  | -1.023373 | -0.640201 |
| C  | 6.256167  | -1.049530 | -0.508467 |
| C  | 6.910778  | -0.068394 | 0.253865  |
| C  | 6.161284  | 0.938396  | 0.884868  |
| C  | 4.764824  | 0.961367  | 0.759797  |
| H  | 4.366335  | -1.795320 | -1.234187 |
| H  | 6.831901  | -1.834725 | -1.004126 |
| H  | 7.998321  | -0.087105 | 0.354815  |
| H  | 6.663626  | 1.704809  | 1.479779  |
| H  | 4.197870  | 1.750822  | 1.257042  |
| C  | 3.214980  | 3.645775  | -0.759797 |
| C  | 3.893317  | 4.866630  | -0.884868 |
| C  | 3.396158  | 6.019106  | -0.253865 |
| C  | 2.219164  | 5.942765  | 0.508467  |
| C  | 1.543838  | 4.720753  | 0.640201  |
| H  | 3.615191  | 2.760051  | -1.257042 |
| H  | 4.808221  | 4.918465  | -1.479779 |
| H  | 3.923725  | 6.970302  | -0.354815 |
| H  | 1.827032  | 6.833962  | 1.004126  |
| H  | 0.628375  | 4.679017  | 1.234187  |
| C  | -1.543838 | 4.720753  | -0.640201 |
| C  | -2.219164 | 5.942765  | -0.508467 |
| C  | -3.396158 | 6.019106  | 0.253865  |
| C  | -3.893317 | 4.866630  | 0.884868  |

|   |           |           |           |
|---|-----------|-----------|-----------|
| C | -3.214980 | 3.645775  | 0.759797  |
| H | -0.628375 | 4.679017  | -1.234187 |
| H | -1.827032 | 6.833962  | -1.004126 |
| H | -3.923725 | 6.970302  | 0.354815  |
| H | -4.808221 | 4.918465  | 1.479779  |
| H | -3.615191 | 2.760051  | 1.257042  |
| C | -4.860211 | -1.023373 | 0.640201  |
| C | -6.256167 | -1.049530 | 0.508467  |
| C | -6.910778 | -0.068394 | -0.253865 |
| C | -6.161284 | 0.938396  | -0.884868 |
| C | -4.764824 | 0.961367  | -0.759797 |
| H | -4.366335 | -1.795320 | 1.234187  |
| H | -6.831901 | -1.834725 | 1.004126  |
| H | -7.998321 | -0.087105 | -0.354815 |
| H | -6.663626 | 1.704809  | -1.479779 |
| H | -4.197870 | 1.750822  | -1.257042 |
| C | -3.316373 | -3.697380 | -0.640201 |
| C | -4.037003 | -4.893235 | -0.508467 |
| C | -3.514620 | -5.950712 | 0.253865  |
| C | -2.267967 | -5.805026 | 0.884868  |
| C | -1.549844 | -4.607142 | 0.759797  |
| H | -3.737960 | -2.883697 | -1.234187 |
| H | -5.004869 | -4.999237 | -1.004126 |
| H | -4.074596 | -6.883197 | 0.354815  |
| H | -1.855405 | -6.623274 | 1.479779  |
| H | -0.582679 | -4.510873 | 1.257042  |
| C | 1.549844  | -4.607142 | -0.759797 |
| C | 2.267967  | -5.805026 | -0.884868 |
| C | 3.514620  | -5.950712 | -0.253865 |
| C | 4.037003  | -4.893235 | 0.508467  |
| C | 3.316373  | -3.697380 | 0.640201  |
| H | 0.582679  | -4.510873 | -1.257042 |
| H | 1.855405  | -6.623274 | -1.479779 |
| H | 4.074596  | -6.883197 | -0.354815 |
| H | 5.004869  | -4.999237 | 1.004126  |
| H | 3.737960  | -2.883697 | 1.234187  |

### B11

|    |           |           |           |
|----|-----------|-----------|-----------|
| Si | -1.176663 | 0.289844  | 0.893112  |
| Si | -0.588715 | 2.334110  | -0.095977 |
| Si | 1.447148  | 1.570278  | -0.453606 |
| Si | 1.157550  | -0.290418 | 0.932940  |
| Si | 0.607445  | -2.332089 | -0.082822 |
| Si | -1.418611 | -1.571820 | -0.502382 |
| C  | -2.962316 | -2.282181 | -1.291084 |
| C  | -2.221814 | 0.374203  | 2.471079  |
| C  | 2.131709  | -0.373000 | 2.554809  |
| C  | 3.002897  | 2.264380  | -1.232671 |
| C  | -1.677220 | 3.411651  | -1.190773 |



C 1.739279 -3.397209 -1.145129  
C -2.339549 1.578772 3.203757  
C -3.091996 1.633614 4.386281  
C -3.747022 0.484074 4.857628  
C -3.644278 -0.720131 4.142285  
C -2.890666 -0.772621 2.960230  
H -1.832667 2.479914 2.846541  
H -3.169847 2.573474 4.938147  
H -4.336565 0.527290 5.776375  
H -4.152483 -1.617463 4.503579  
H -2.816756 -1.716459 2.412243  
C 2.559551 0.812916 3.197861  
C 3.249515 0.763351 4.417644  
C 3.531914 -0.475811 5.016563  
C 3.119663 -1.663148 4.390863  
C 2.427349 -1.611099 3.171315  
H 2.344133 1.783325 2.740847  
H 3.568304 1.690397 4.900299  
H 4.072538 -0.515446 5.965090  
H 3.338036 -2.629753 4.851248  
H 2.107062 -2.542417 2.695264  
C 2.952612 3.295879 -2.205163  
C 4.126843 3.791447 -2.785965  
C 5.375552 3.264481 -2.411800  
C 5.445204 2.239755 -1.453625  
C 4.271292 1.744603 -0.868846  
H 1.986400 3.706172 -2.511326  
H 4.070836 4.586521 -3.533134  
H 6.290248 3.651994 -2.865858  
H 6.414237 1.830281 -1.159042  
H 4.336734 0.955228 -0.114812  
C -1.150999 4.532388 -1.880749  
C -1.967673 5.320364 -2.702538  
C -3.331811 5.012513 -2.844492  
C -3.873674 3.913011 -2.159124  
C -3.056217 3.122936 -1.337894  
H -0.092971 4.787879 -1.772206  
H -1.542000 6.176218 -3.231946  
H -3.968366 5.627825 -3.484119  
H -4.933320 3.669136 -2.265979  
H -3.490105 2.266066 -0.814832  
C 3.121241 -3.100429 -1.239879  
C 3.972963 -3.882267 -2.033722  
C 3.462883 -4.981557 -2.743347  
C 2.096088 -5.297309 -2.653340  
C 1.245133 -4.517442 -1.859095  
H 3.530724 -2.243386 -0.697587  
H 5.034420 -3.632046 -2.100345  
H 4.125987 -5.590485 -3.361753

H 1.695107 -6.153008 -3.201913  
H 0.185132 -4.778511 -1.791244  
C -4.237446 -1.780512 -0.924717  
C -5.404611 -2.285883 -1.514418  
C -5.321441 -3.302391 -2.480213  
C -4.065983 -3.811543 -2.856544  
C -2.898501 -3.306114 -2.270662  
H -4.313498 -0.998480 -0.164027  
H -6.378884 -1.890449 -1.217932  
H -6.230775 -3.697345 -2.938599  
H -3.999493 -4.600404 -3.609420  
H -1.927143 -3.702876 -2.578433

## **B12**

Si -1.384828 -0.214298 1.188253  
Si 0.987748 -0.334977 1.505660  
Si 1.245158 -1.077927 -0.746856  
Si -1.120409 -0.994509 -1.034135  
Si -1.103081 1.362038 -0.559917  
Si 1.259483 1.241611 -0.268663  
C 2.043160 -0.648895 3.042923  
C 2.600657 -2.093390 -1.590855  
C -2.258113 -2.108869 -2.053236  
C -2.175196 2.824541 -1.102104  
C 2.609598 2.520844 -0.607819  
C -2.862268 -0.515598 2.338120  
C -1.808187 3.626288 -2.214415  
C -2.604684 4.719161 -2.609785  
C -3.787061 5.024465 -1.902988  
C -4.166018 4.237700 -0.799105  
C -3.365329 3.149741 -0.398539  
H -0.895657 3.397120 -2.773117  
H -2.306658 5.327605 -3.467457  
H -4.406206 5.870337 -2.211224  
H -5.078831 4.473868 -0.246520  
H -3.661900 2.551392 0.467924  
C 3.969466 2.217481 -0.389994  
C 4.968309 3.160459 -0.663608  
C 4.626686 4.424905 -1.158433  
C 3.286421 4.744520 -1.373732  
C 2.283405 3.802789 -1.100032  
H 4.252091 1.237625 0.004801  
H 6.016406 2.907641 -0.487465  
H 5.406432 5.158571 -1.372521  
H 3.014534 5.731171 -1.755809  
H 1.236618 4.069518 -1.269891  
C 3.390199 -1.061862 2.914266  
C 4.191728 -1.264584 4.049296  
C 3.658719 -1.068283 5.331893

C 2.322981 -0.667884 5.477380  
C 1.521570 -0.457502 4.342298  
H 3.814293 -1.231345 1.920058  
H 5.230317 -1.583046 3.931693  
H 4.281378 -1.230704 6.214458  
H 1.902194 -0.518386 6.474612  
H 0.480623 -0.147256 4.470089  
C -3.678271 -1.676694 2.181355  
C -4.795124 -1.896382 3.016405  
C -5.113302 -0.969458 4.023171  
C -4.309861 0.186748 4.198111  
C -3.196618 0.409494 3.358776  
H -3.435356 -2.406204 1.403461  
H -5.409937 -2.789607 2.880126  
H -5.977836 -1.139422 4.669668  
H -4.554664 0.910207 4.980434  
H -2.588261 1.308249 3.497769  
C -1.731676 -2.944263 -3.064894  
C -2.564296 -3.775965 -3.813346  
C -3.929165 -3.789240 -3.573221  
C -4.469394 -2.966090 -2.574357  
C -3.639783 -2.137427 -1.821687  
H -0.657198 -2.941929 -3.267621  
H -2.138831 -4.415312 -4.589720  
H -4.580770 -4.440155 -4.159552  
H -5.544512 -2.974951 -2.381209  
H -4.074275 -1.507661 -1.041853  
C 2.462565 -3.476849 -1.792652  
C 3.479976 -4.214931 -2.398522  
C 4.654738 -3.585992 -2.802813  
C 4.809667 -2.220553 -2.610013  
C 3.791264 -1.475683 -2.016375  
H 1.548533 -3.984023 -1.472867  
H 3.355022 -5.289047 -2.551647  
H 5.451125 -4.165389 -3.273292  
H 5.727125 -1.724577 -2.933235  
H 3.916623 -0.397888 -1.889700

### B13

C -1.446532 -1.195312 3.028567  
C -2.146401 -0.592142 1.952822  
C -3.557769 -0.704947 1.916822  
C -4.241133 -1.412948 2.915735  
C -3.534461 -2.019359 3.967212  
C -2.135271 -1.905865 4.022594  
Si -1.176221 0.299574 0.603368  
Si 1.103856 -0.182696 0.385191  
C 2.012822 -1.338137 1.562055  
C 3.017843 -0.777467 2.386334

|    |           |           |           |
|----|-----------|-----------|-----------|
| C  | 3.781748  | -1.589461 | 3.238368  |
| C  | 3.552133  | -2.973257 | 3.280410  |
| C  | 2.555171  | -3.542265 | 2.470529  |
| C  | 1.792041  | -2.733627 | 1.618909  |
| Si | -1.428444 | 2.158553  | -0.787344 |
| Si | 0.549662  | 3.126060  | -1.684371 |
| Si | 1.974026  | 1.258365  | -1.207571 |
| Si | 1.687551  | -0.916512 | -2.110543 |
| Si | -0.437712 | -1.362875 | -1.292505 |
| C  | -0.972487 | -3.152644 | -1.004927 |
| C  | -1.007064 | -4.031359 | -2.114370 |
| C  | -1.478639 | -5.345560 | -1.977740 |
| C  | -1.924768 | -5.805346 | -0.727868 |
| C  | -1.898780 | -4.945008 | 0.381308  |
| C  | -1.430313 | -3.629747 | 0.244904  |
| C  | -2.958331 | 3.182407  | -0.343364 |
| C  | -3.726797 | 2.917413  | 0.814721  |
| C  | -4.897397 | 3.641188  | 1.082641  |
| C  | -5.317971 | 4.652175  | 0.202847  |
| C  | -4.557634 | 4.940951  | -0.942004 |
| C  | -3.388451 | 4.213022  | -1.212473 |
| Si | -2.110204 | 0.142311  | -1.779555 |
| C  | -3.889331 | -0.444979 | -1.472259 |
| C  | -4.925986 | 0.517479  | -1.378083 |
| C  | -6.240491 | 0.130352  | -1.076384 |
| C  | -6.551436 | -1.224455 | -0.876296 |
| C  | -5.540724 | -2.192622 | -0.998084 |
| C  | -4.226130 | -1.809574 | -1.297824 |
| C  | 1.249367  | 4.031187  | -0.087369 |
| C  | 2.198007  | 5.059230  | -0.305740 |
| C  | 2.837122  | 5.713458  | 0.760159  |
| C  | 2.535156  | 5.360565  | 2.084372  |
| C  | 1.588436  | 4.351372  | 2.331168  |
| C  | 0.961114  | 3.697250  | 1.259376  |
| C  | 3.801735  | 1.678080  | -0.931350 |
| C  | 4.203966  | 2.391099  | 0.224320  |
| C  | 5.549614  | 2.732577  | 0.424125  |
| C  | 6.519460  | 2.373819  | -0.525838 |
| C  | 6.136416  | 1.678629  | -1.684109 |
| C  | 4.789893  | 1.338096  | -1.885342 |
| C  | 2.898839  | -2.267878 | -1.508431 |
| C  | 2.590111  | -3.629977 | -1.739877 |
| C  | 3.433607  | -4.651864 | -1.278955 |
| C  | 4.616280  | -4.332614 | -0.593727 |
| C  | 4.950006  | -2.986267 | -0.375330 |
| C  | 4.101615  | -1.965901 | -0.825052 |
| H  | -4.704715 | 1.576782  | -1.513291 |
| H  | -7.018604 | 0.892594  | -0.992077 |
| H  | -7.574033 | -1.524013 | -0.635409 |

|   |           |           |           |
|---|-----------|-----------|-----------|
| H | -5.772470 | -3.250427 | -0.852409 |
| H | -3.457048 | -2.577278 | -1.378202 |
| H | -0.671802 | -3.683136 | -3.095107 |
| H | -1.500464 | -6.007461 | -2.846322 |
| H | -2.293953 | -6.827713 | -0.620991 |
| H | -2.249000 | -5.291858 | 1.356024  |
| H | -1.436097 | -2.973224 | 1.113515  |
| H | 1.674281  | -3.899098 | -2.269460 |
| H | 3.165844  | -5.696349 | -1.456995 |
| H | 5.273860  | -5.127034 | -0.233132 |
| H | 5.864494  | -2.727762 | 0.163243  |
| H | 4.366339  | -0.928982 | -0.620624 |
| H | 3.460506  | 2.698584  | 0.961198  |
| H | 5.836376  | 3.286667  | 1.321018  |
| H | 7.567484  | 2.639092  | -0.367836 |
| H | 6.884140  | 1.400832  | -2.430739 |
| H | 4.506908  | 0.793101  | -2.789555 |
| H | 2.454798  | 5.343006  | -1.331079 |
| H | 3.573820  | 6.494638  | 0.555625  |
| H | 3.028997  | 5.867794  | 2.916812  |
| H | 1.343762  | 4.068845  | 3.358869  |
| H | 0.246647  | 2.898079  | 1.476739  |
| H | -2.808974 | 4.442363  | -2.110779 |
| H | -4.875839 | 5.730477  | -1.626821 |
| H | -6.230469 | 5.215571  | 0.410816  |
| H | -5.480230 | 3.416445  | 1.979005  |
| H | -3.417873 | 2.130597  | 1.506757  |
| H | 3.219511  | 0.296157  | 2.347862  |
| H | 4.558719  | -1.141755 | 3.862342  |
| H | 4.151473  | -3.607722 | 3.937372  |
| H | 2.381806  | -4.620432 | 2.489705  |
| H | 1.045044  | -3.195746 | 0.974444  |
| H | -4.123879 | -0.256559 | 1.101075  |
| H | -5.328814 | -1.498398 | 2.862094  |
| H | -4.070327 | -2.575042 | 4.740061  |
| H | -1.577434 | -2.370943 | 4.838795  |
| H | -0.357181 | -1.128194 | 3.079060  |

#### **B14**

|    |           |           |          |
|----|-----------|-----------|----------|
| C  | -2.309101 | -1.933230 | 4.565225 |
| C  | -1.194470 | -2.280353 | 3.763588 |
| C  | -0.462657 | -3.447392 | 4.091397 |
| C  | -0.831982 | -4.240186 | 5.188106 |
| C  | -1.939705 | -3.882179 | 5.973715 |
| C  | -2.678202 | -2.728716 | 5.659059 |
| Si | -0.677959 | -1.203734 | 2.301615 |
| Si | 1.042861  | -1.392929 | 0.753525 |
| C  | 2.794922  | -1.773158 | 1.358095 |
| C  | 3.065348  | -2.082504 | 2.712482 |

|    |           |           |           |
|----|-----------|-----------|-----------|
| C  | 4.383091  | -2.262908 | 3.160162  |
| C  | 5.456980  | -2.144772 | 2.261879  |
| C  | 5.205791  | -1.845412 | 0.913159  |
| C  | 3.888381  | -1.665004 | 0.467215  |
| Si | -1.798638 | 0.179961  | 0.766854  |
| C  | -3.244643 | 1.265079  | 1.314179  |
| C  | -4.475329 | 1.200520  | 0.617540  |
| C  | -5.537432 | 2.056708  | 0.949953  |
| C  | -5.391480 | 2.988888  | 1.989619  |
| C  | -4.179011 | 3.059524  | 2.697674  |
| C  | -3.116551 | 2.208779  | 2.361203  |
| Si | 0.335753  | 0.723728  | 1.441383  |
| C  | 1.355858  | 2.286554  | 1.661854  |
| C  | 2.687961  | 2.198356  | 2.135376  |
| C  | 3.488142  | 3.345639  | 2.222701  |
| C  | 2.975372  | 4.595332  | 1.834003  |
| C  | 1.657611  | 4.693826  | 1.358209  |
| C  | 0.848308  | 3.550277  | 1.275471  |
| Si | -1.589826 | -0.329850 | -1.510663 |
| C  | -3.064640 | -1.125528 | -2.397018 |
| C  | -3.386371 | -0.811665 | -3.737787 |
| C  | -4.455281 | -1.445255 | -4.390847 |
| C  | -5.223642 | -2.406506 | -3.714135 |
| C  | -4.920363 | -2.730367 | -2.381327 |
| C  | -3.852273 | -2.094969 | -1.730497 |
| Si | 0.493816  | -1.500097 | -1.528929 |
| C  | 0.648084  | -3.165625 | -2.411134 |
| C  | 1.692314  | -4.062174 | -2.079779 |
| C  | 1.804407  | -5.304210 | -2.722523 |
| C  | 0.868758  | -5.675394 | -3.702266 |
| C  | -0.178360 | -4.801110 | -4.036580 |
| C  | -0.288315 | -3.556613 | -3.397761 |
| Si | 1.420144  | 0.521548  | -2.238236 |
| C  | 3.195008  | 1.115394  | -2.057217 |
| C  | 4.280085  | 0.346104  | -2.547465 |
| C  | 5.605181  | 0.744006  | -2.319961 |
| C  | 5.870597  | 1.920067  | -1.598207 |
| C  | 4.807751  | 2.697083  | -1.109760 |
| C  | 3.481492  | 2.302635  | -1.337150 |
| Si | -0.526833 | 1.539592  | -2.430686 |
| C  | -0.897295 | 3.308699  | -1.891491 |
| C  | 0.025254  | 4.363063  | -2.098442 |
| C  | -0.219197 | 5.643148  | -1.582302 |
| C  | -1.388431 | 5.897686  | -0.844156 |
| C  | -2.320747 | 4.866661  | -0.640223 |
| C  | -2.084296 | 3.589841  | -1.171172 |
| H  | 4.084073  | -0.573032 | -3.106792 |
| H  | 6.429357  | 0.139013  | -2.705610 |
| H  | 6.902902  | 2.227354  | -1.415321 |

|   |           |           |           |
|---|-----------|-----------|-----------|
| H | 5.005399  | 3.603680  | -0.534821 |
| H | 2.669840  | 2.905272  | -0.924757 |
| H | 0.950637  | 4.175568  | -2.649514 |
| H | 0.508714  | 6.441293  | -1.747023 |
| H | -1.571424 | 6.893060  | -0.432917 |
| H | -3.229801 | 5.047327  | -0.062423 |
| H | -2.817195 | 2.801414  | -0.990450 |
| H | -2.790738 | -0.066412 | -4.272602 |
| H | -4.688929 | -1.188075 | -5.426844 |
| H | -6.055266 | -2.900242 | -4.222087 |
| H | -5.514648 | -3.477639 | -1.849969 |
| H | -3.624138 | -2.359069 | -0.693472 |
| H | 2.421104  | -3.788498 | -1.310950 |
| H | 2.617047  | -5.984153 | -2.455291 |
| H | 0.952880  | -6.644500 | -4.199698 |
| H | -0.912852 | -5.089758 | -4.792352 |
| H | -1.113691 | -2.890137 | -3.659755 |
| H | 3.104206  | 1.228433  | 2.418231  |
| H | 4.515765  | 3.262597  | 2.584071  |
| H | 3.602389  | 5.487914  | 1.898495  |
| H | 1.254194  | 5.657040  | 1.040745  |
| H | -0.166777 | 3.641980  | 0.884459  |
| H | -4.601206 | 0.483323  | -0.198527 |
| H | -6.477201 | 1.995426  | 0.396059  |
| H | -6.215983 | 3.657802  | 2.246653  |
| H | -4.058221 | 3.786065  | 3.504929  |
| H | -2.171871 | 2.288936  | 2.905906  |
| H | 2.241152  | -2.174768 | 3.425167  |
| H | 4.571353  | -2.498326 | 4.210526  |
| H | 6.482253  | -2.284547 | 2.612141  |
| H | 6.033242  | -1.738083 | 0.207854  |
| H | 3.714195  | -1.408820 | -0.579706 |
| H | 0.396456  | -3.738077 | 3.480936  |
| H | -0.258066 | -5.138720 | 5.426856  |
| H | -2.228054 | -4.500262 | 6.826926  |
| H | -3.542087 | -2.449478 | 6.266851  |
| H | -2.890997 | -1.037817 | 4.330025  |

### C1

|   |           |           |           |
|---|-----------|-----------|-----------|
| C | -4.005462 | 0.133981  | -1.372232 |
| C | -4.093136 | 0.871979  | -0.168429 |
| C | -5.063381 | 0.491186  | 0.784813  |
| C | -5.917020 | -0.592890 | 0.543378  |
| C | -5.819164 | -1.317821 | -0.657159 |
| C | -4.858857 | -0.953464 | -1.611867 |
| C | -3.216419 | 2.054011  | 0.059116  |
| C | -1.800466 | 1.976785  | -0.124660 |
| C | -1.035115 | 3.177254  | -0.001783 |
| C | -1.662659 | 4.372249  | 0.397866  |

|    |           |           |           |
|----|-----------|-----------|-----------|
| C  | -3.042932 | 4.419202  | 0.637900  |
| C  | -3.815840 | 3.267507  | 0.450132  |
| Si | -1.020846 | 0.239933  | -0.274701 |
| Si | 1.020291  | -0.240210 | 0.275509  |
| C  | 1.800402  | -1.976755 | 0.124568  |
| C  | 3.216329  | -2.053714 | -0.059525 |
| C  | 3.815758  | -3.266986 | -0.451263 |
| C  | 3.042944  | -4.418674 | -0.639432 |
| C  | 1.662718  | -4.371994 | -0.399074 |
| C  | 1.035167  | -3.177250 | 0.001288  |
| C  | 4.093028  | -0.871754 | 0.168384  |
| C  | 5.063412  | -0.490813 | -0.784672 |
| C  | 5.917176  | 0.593080  | -0.542883 |
| C  | 5.819289  | 1.317736  | 0.657819  |
| C  | 4.858818  | 0.953275  | 1.612320  |
| C  | 4.005328  | -0.134022 | 1.372345  |
| C  | -0.427792 | -3.204095 | 0.282134  |
| C  | -1.353014 | -3.497621 | -0.738670 |
| C  | -2.730233 | -3.479164 | -0.473809 |
| C  | -3.195995 | -3.192820 | 0.818790  |
| C  | -2.279072 | -2.935207 | 1.849974  |
| C  | -0.905007 | -2.931385 | 1.580783  |
| C  | 0.427908  | 3.203896  | -0.282281 |
| C  | 1.352835  | 3.498248  | 0.738555  |
| C  | 2.730128  | 3.479758  | 0.474074  |
| C  | 3.196258  | 3.192530  | -0.818192 |
| C  | 2.279631  | 2.934032  | -1.849422 |
| C  | 0.905497  | 2.930280  | -1.580602 |
| H  | -4.899606 | 3.301911  | 0.582066  |
| H  | -3.516470 | 5.355735  | 0.939957  |
| H  | -1.055011 | 5.274281  | 0.499078  |
| H  | 4.899502  | -3.301238 | -0.583422 |
| H  | 3.516533  | -5.355000 | -0.942050 |
| H  | 1.055127  | -5.274030 | -0.500592 |
| H  | -0.984952 | -3.703917 | -1.746089 |
| H  | -3.442076 | -3.674327 | -1.278134 |
| H  | -4.268312 | -3.157695 | 1.015758  |
| H  | -2.635923 | -2.717281 | 2.858955  |
| H  | -0.187649 | -2.707832 | 2.372720  |
| H  | 5.129749  | -1.046954 | -1.721908 |
| H  | 6.658607  | 0.876445  | -1.293454 |
| H  | 6.488970  | 2.159856  | 0.846027  |
| H  | 4.780820  | 1.503457  | 2.552100  |
| H  | 3.297372  | -0.451786 | 2.141000  |
| H  | 0.984477  | 3.705239  | 1.745724  |
| H  | 3.441722  | 3.675690  | 1.278434  |
| H  | 4.268625  | 3.157389  | -1.014863 |
| H  | 2.636773  | 2.715389  | -2.858145 |
| H  | 0.188375  | 2.706097  | -2.372573 |



|   |           |           |           |
|---|-----------|-----------|-----------|
| H | -5.129699 | 1.047563  | 1.721910  |
| H | -6.658331 | -0.876182 | 1.294094  |
| H | -6.488751 | -2.160077 | -0.845090 |
| H | -4.780910 | -1.503858 | -2.551526 |
| H | -3.297574 | 0.451642  | -2.140992 |

## C2

|    |           |           |           |
|----|-----------|-----------|-----------|
| C  | 5.151103  | 0.444130  | -0.179485 |
| C  | 4.500745  | 0.547578  | 1.065545  |
| C  | 4.379649  | -0.603439 | 1.872815  |
| C  | 4.888404  | -1.834164 | 1.437257  |
| C  | 5.522928  | -1.929904 | 0.188646  |
| C  | 5.650762  | -0.790142 | -0.619209 |
| C  | 3.954022  | 1.853651  | 1.531230  |
| C  | 2.568523  | 2.038471  | 1.817837  |
| C  | 2.144036  | 3.280505  | 2.380400  |
| C  | 3.076971  | 4.324023  | 2.555272  |
| C  | 4.417313  | 4.158960  | 2.190921  |
| C  | 4.853534  | 2.924276  | 1.694422  |
| Si | 1.291559  | 0.721074  | 1.286388  |
| Si | 1.399038  | -1.163899 | 0.264338  |
| C  | 1.781424  | -3.031349 | 0.281450  |
| C  | 2.415791  | -3.688614 | -0.817053 |
| C  | 2.746738  | -5.057915 | -0.697946 |
| C  | 2.504198  | -5.767408 | 0.481813  |
| C  | 1.921096  | -5.116171 | 1.576279  |
| C  | 1.547571  | -3.762842 | 1.483691  |
| C  | 2.830151  | -2.985111 | -2.066029 |
| C  | 4.112993  | -3.243057 | -2.604588 |
| C  | 4.557344  | -2.598546 | -3.765138 |
| C  | 3.724497  | -1.677736 | -4.422762 |
| C  | 2.445743  | -1.417662 | -3.910867 |
| C  | 2.004782  | -2.064077 | -2.745873 |
| C  | 0.965622  | -3.098252 | 2.687236  |
| C  | 1.738477  | -2.955302 | 3.857594  |
| C  | 1.225519  | -2.270329 | 4.969252  |
| C  | -0.075091 | -1.738881 | 4.930237  |
| C  | -0.862548 | -1.901378 | 3.779828  |
| C  | -0.341148 | -2.573286 | 2.665707  |
| C  | 0.737807  | 3.520260  | 2.807294  |
| C  | 0.027012  | 2.556588  | 3.558370  |
| C  | -1.294862 | 2.790775  | 3.963066  |
| C  | -1.922895 | 4.007156  | 3.655491  |
| C  | -1.217959 | 4.987870  | 2.938412  |
| C  | 0.094504  | 4.743446  | 2.512799  |
| Si | -0.465194 | 0.149733  | -0.222016 |
| C  | -0.593155 | 0.296103  | -2.144463 |
| C  | -1.483176 | -0.575120 | -2.845904 |
| C  | -1.653932 | -0.443937 | -4.241982 |

|    |           |           |           |
|----|-----------|-----------|-----------|
| C  | -0.920525 | 0.495762  | -4.974196 |
| C  | 0.014157  | 1.297707  | -4.311679 |
| C  | 0.185337  | 1.211919  | -2.913329 |
| C  | -2.221991 | -1.718234 | -2.215232 |
| C  | -1.547811 | -2.759365 | -1.536976 |
| C  | -2.231708 | -3.902548 | -1.098412 |
| C  | -3.612237 | -4.025428 | -1.318064 |
| C  | -4.298111 | -2.992590 | -1.974514 |
| C  | -3.610466 | -1.856048 | -2.420983 |
| C  | 1.209067  | 2.118124  | -2.318348 |
| C  | 0.882197  | 3.018618  | -1.286588 |
| C  | 1.830573  | 3.931115  | -0.807883 |
| C  | 3.132762  | 3.940906  | -1.329158 |
| C  | 3.476191  | 3.035285  | -2.345422 |
| C  | 2.518923  | 2.138555  | -2.842623 |
| Si | -2.425128 | 0.572333  | 1.087334  |
| C  | -3.886462 | 0.633391  | -0.193627 |
| C  | -3.992596 | 1.581781  | -1.254868 |
| C  | -5.101953 | 1.562678  | -2.125977 |
| C  | -6.159861 | 0.664737  | -1.931276 |
| C  | -6.114831 | -0.219516 | -0.850079 |
| C  | -4.990938 | -0.254321 | -0.000076 |
| C  | -3.039023 | 2.713656  | -1.419567 |
| C  | -2.534349 | 3.056607  | -2.693442 |
| C  | -1.797007 | 4.231005  | -2.878698 |
| C  | -1.554365 | 5.094166  | -1.796565 |
| C  | -2.020880 | 4.751559  | -0.519964 |
| C  | -2.750979 | 3.566874  | -0.329742 |
| C  | -4.961936 | -1.259727 | 1.087985  |
| C  | -3.799602 | -2.029149 | 1.326883  |
| C  | -3.766789 | -2.973014 | 2.368724  |
| C  | -4.886433 | -3.154597 | 3.189852  |
| C  | -6.050546 | -2.398719 | 2.958050  |
| C  | -6.088291 | -1.465620 | 1.915238  |
| H  | -6.929812 | -0.926634 | -0.679340 |
| H  | -7.018259 | 0.670924  | -2.606715 |
| H  | -5.150349 | 2.298205  | -2.932066 |
| H  | -3.161593 | 3.340723  | 0.657915  |
| H  | -1.821067 | 5.398887  | 0.333742  |
| H  | -0.981151 | 6.011420  | -1.945197 |
| H  | -1.397491 | 4.466224  | -3.867208 |
| H  | -2.707220 | 2.378963  | -3.530410 |
| H  | -2.870429 | -3.572947 | 2.525965  |
| H  | -4.859273 | -3.886270 | 4.000247  |
| H  | -6.926068 | -2.532786 | 3.597502  |
| H  | -6.983560 | -0.863029 | 1.747950  |
| H  | -2.977862 | -1.992623 | 0.606822  |
| H  | -2.345962 | -1.117931 | -4.751433 |
| H  | -1.059541 | 0.583890  | -6.054219 |

|   |           |           |           |
|---|-----------|-----------|-----------|
| H | 0.611738  | 2.022764  | -4.868677 |
| H | -0.127074 | 3.024634  | -0.884081 |
| H | 1.551043  | 4.627844  | -0.018233 |
| H | 3.873965  | 4.639212  | -0.936547 |
| H | 4.489437  | 3.027106  | -2.754962 |
| H | 2.789267  | 1.426671  | -3.624442 |
| H | -0.476321 | -2.701881 | -1.367579 |
| H | -1.677096 | -4.692806 | -0.587274 |
| H | -4.150316 | -4.908655 | -0.967777 |
| H | -5.377040 | -3.059738 | -2.127159 |
| H | -4.153844 | -1.047309 | -2.910155 |
| H | 3.199726  | -5.563407 | -1.552898 |
| H | 2.768992  | -6.824953 | 0.548284  |
| H | 1.735977  | -5.653267 | 2.509083  |
| H | 4.774207  | -3.936816 | -2.083228 |
| H | 5.557174  | -2.809991 | -4.151674 |
| H | 4.067976  | -1.174879 | -5.329725 |
| H | 1.771880  | -0.723092 | -4.413055 |
| H | 0.990785  | -1.865121 | -2.409507 |
| H | 2.752737  | -3.360374 | 3.877496  |
| H | 1.840884  | -2.149362 | 5.863715  |
| H | -0.473324 | -1.203532 | 5.795360  |
| H | -1.872392 | -1.491995 | 3.732592  |
| H | -0.939360 | -2.678755 | 1.760581  |
| H | 2.741967  | 5.261890  | 3.003182  |
| H | 5.127514  | 4.977408  | 2.328594  |
| H | 5.906236  | 2.767456  | 1.449461  |
| H | 3.871364  | -0.530139 | 2.836153  |
| H | 4.772403  | -2.721858 | 2.062195  |
| H | 5.903710  | -2.892117 | -0.157917 |
| H | 6.115379  | -0.868252 | -1.603706 |
| H | 5.218308  | 1.327483  | -0.816669 |
| H | 0.630217  | 5.498739  | 1.934380  |
| H | -1.695429 | 5.941376  | 2.700935  |
| H | -2.950588 | 4.191591  | 3.975143  |
| H | -1.829119 | 2.021671  | 4.522497  |
| H | 0.520731  | 1.627624  | 3.851387  |

### C2-TS

|   |           |           |          |
|---|-----------|-----------|----------|
| C | 3.033941  | 1.425293  | 2.895000 |
| C | 2.472660  | 0.353083  | 3.625116 |
| C | 3.333495  | -0.664907 | 4.090898 |
| C | 4.707875  | -0.626025 | 3.817379 |
| C | 5.251740  | 0.444479  | 3.089148 |
| C | 4.408730  | 1.471422  | 2.634332 |
| C | 1.020671  | 0.359204  | 3.953005 |
| C | 0.029798  | 0.748309  | 2.997929 |
| C | -1.295159 | 1.006527  | 3.470376 |
| C | -1.643090 | 0.680563  | 4.797995 |

|    |           |           |           |
|----|-----------|-----------|-----------|
| C  | -0.689691 | 0.168421  | 5.686932  |
| C  | 0.642960  | 0.053205  | 5.278380  |
| Si | 0.403227  | 0.529226  | 1.118509  |
| Si | -0.845338 | 1.442419  | -0.623369 |
| C  | -1.502129 | 3.026349  | -1.422965 |
| C  | -2.697315 | 3.031928  | -2.204609 |
| C  | -3.189066 | 4.250237  | -2.712097 |
| C  | -2.534800 | 5.459958  | -2.444335 |
| C  | -1.352289 | 5.461527  | -1.695256 |
| C  | -0.813044 | 4.256849  | -1.201600 |
| C  | -3.446692 | 1.782480  | -2.528036 |
| C  | -3.653560 | 1.425886  | -3.877228 |
| C  | -4.306165 | 0.228491  | -4.208597 |
| C  | -4.769191 | -0.622830 | -3.192722 |
| C  | -4.598724 | -0.260016 | -1.847588 |
| C  | -3.945435 | 0.935492  | -1.516301 |
| C  | 0.474975  | 4.313058  | -0.454702 |
| C  | 1.583503  | 3.538764  | -0.860110 |
| C  | 2.793778  | 3.594112  | -0.152417 |
| C  | 2.912470  | 4.431592  | 0.967884  |
| C  | 1.817622  | 5.211276  | 1.379966  |
| C  | 0.610260  | 5.157789  | 0.669341  |
| C  | -2.315238 | 1.732836  | 2.661175  |
| C  | -3.658279 | 1.305491  | 2.599967  |
| C  | -4.623405 | 2.066563  | 1.925647  |
| C  | -4.267025 | 3.277408  | 1.309969  |
| C  | -2.936539 | 3.718290  | 1.372458  |
| C  | -1.968434 | 2.953076  | 2.038517  |
| Si | -0.944514 | -0.682403 | -0.415656 |
| C  | -1.601476 | -2.281638 | -1.202251 |
| C  | -1.042520 | -2.709612 | -2.443486 |
| C  | -1.379315 | -3.972573 | -2.969117 |
| C  | -2.307947 | -4.793189 | -2.319495 |
| C  | -2.920674 | -4.345886 | -1.143839 |
| C  | -2.577112 | -3.104965 | -0.565821 |
| C  | -0.150475 | -1.835344 | -3.257759 |
| C  | 1.128837  | -2.271297 | -3.652168 |
| C  | 1.943686  | -1.451575 | -4.445087 |
| C  | 1.492689  | -0.186482 | -4.851713 |
| C  | 0.210719  | 0.248193  | -4.475757 |
| C  | -0.609187 | -0.573853 | -3.691878 |
| C  | -3.271569 | -2.739134 | 0.701727  |
| C  | -4.672804 | -2.902100 | 0.800126  |
| C  | -5.347654 | -2.652928 | 2.003178  |
| C  | -4.628155 | -2.255301 | 3.142414  |
| C  | -3.237658 | -2.085747 | 3.057314  |
| C  | -2.568761 | -2.307699 | 1.845275  |
| Si | 1.980447  | 0.042216  | -0.539531 |
| C  | 2.747512  | -1.785194 | -0.602126 |

|   |           |           |           |
|---|-----------|-----------|-----------|
| C | 3.894173  | -1.776663 | -1.466956 |
| C | 4.336830  | -2.943140 | -2.119964 |
| C | 3.683840  | -4.161379 | -1.908407 |
| C | 2.637063  | -4.220217 | -0.982377 |
| C | 2.178763  | -3.065440 | -0.304724 |
| C | 4.692977  | -0.535072 | -1.675346 |
| C | 5.128803  | 0.216914  | -0.560261 |
| C | 5.904649  | 1.371800  | -0.732551 |
| C | 6.257244  | 1.799535  | -2.022973 |
| C | 5.839696  | 1.053679  | -3.138174 |
| C | 5.073347  | -0.106954 | -2.964913 |
| C | 1.217513  | -3.307078 | 0.808028  |
| C | 0.238939  | -4.325563 | 0.730645  |
| C | -0.472237 | -4.729861 | 1.866791  |
| C | -0.239722 | -4.109554 | 3.105057  |
| C | 0.681623  | -3.053636 | 3.184019  |
| C | 1.402786  | -2.658598 | 2.047933  |
| H | -0.815513 | 6.394267  | -1.509880 |
| H | -2.939056 | 6.397810  | -2.831587 |
| H | -4.108514 | 4.239938  | -3.301033 |
| H | 5.217357  | -2.889481 | -2.765167 |
| H | 4.022705  | -5.068632 | -2.413907 |
| H | 2.198128  | -5.188997 | -0.735635 |
| H | 1.414271  | -0.234140 | 5.996249  |
| H | -0.971991 | -0.074703 | 6.713737  |
| H | -2.661529 | 0.878718  | 5.139121  |
| H | 2.912636  | -1.509220 | 4.639781  |
| H | 5.352440  | -1.435221 | 4.167007  |
| H | 6.322131  | 0.475364  | 2.874573  |
| H | 4.817467  | 2.309494  | 2.067821  |
| H | 2.393479  | 2.242887  | 2.561527  |
| H | 0.036034  | -4.797538 | -0.231556 |
| H | -1.227820 | -5.513109 | 1.778408  |
| H | -0.801294 | -4.419100 | 3.988766  |
| H | 0.841405  | -2.533544 | 4.129823  |
| H | 2.159316  | -1.879200 | 2.121666  |
| H | -3.938703 | 0.360007  | 3.060238  |
| H | -5.652562 | 1.704464  | 1.871553  |
| H | -5.014987 | 3.866664  | 0.775810  |
| H | -2.645347 | 4.648371  | 0.883305  |
| H | -0.938444 | 3.308018  | 2.096099  |
| H | 4.870405  | -0.125220 | 0.442538  |
| H | 6.238013  | 1.933336  | 0.143337  |
| H | 6.857611  | 2.701879  | -2.159679 |
| H | 6.107413  | 1.381562  | -4.145419 |
| H | 4.729263  | -0.672587 | -3.831820 |
| H | 1.506737  | 2.889804  | -1.734656 |
| H | 3.629853  | 2.974758  | -0.479709 |
| H | 3.852409  | 4.476858  | 1.522562  |

|   |           |           |           |
|---|-----------|-----------|-----------|
| H | 1.902515  | 5.856464  | 2.257315  |
| H | -0.246141 | 5.752423  | 0.995318  |
| H | -3.835897 | 1.221797  | -0.471038 |
| H | -4.959416 | -0.909434 | -1.048649 |
| H | -5.258174 | -1.565523 | -3.447919 |
| H | -4.434132 | -0.046454 | -5.257709 |
| H | -3.265829 | 2.077060  | -4.664080 |
| H | -3.654402 | -4.975157 | -0.636283 |
| H | -2.566909 | -5.769364 | -2.735742 |
| H | -0.926661 | -4.283975 | -3.912792 |
| H | -5.229743 | -3.226306 | -0.081907 |
| H | -6.431663 | -2.779026 | 2.052955  |
| H | -5.148152 | -2.078894 | 4.087035  |
| H | -2.660862 | -1.778803 | 3.931015  |
| H | -1.486951 | -2.209475 | 1.815001  |
| H | -1.613297 | -0.247564 | -3.422883 |
| H | -0.156102 | 1.226392  | -4.795407 |
| H | 2.136107  | 0.457611  | -5.455425 |
| H | 2.938078  | -1.801609 | -4.727376 |
| H | 1.499038  | -3.235845 | -3.303902 |

## C5

|    |           |           |           |
|----|-----------|-----------|-----------|
| C  | 3.342303  | -1.561219 | 2.287661  |
| C  | 1.917312  | -1.620546 | 2.148754  |
| C  | 1.159119  | -1.978219 | 3.306335  |
| C  | 1.812440  | -2.274671 | 4.522943  |
| C  | 3.208106  | -2.260898 | 4.621116  |
| C  | 3.968620  | -1.902308 | 3.502101  |
| Si | 1.289689  | -1.507246 | 0.315015  |
| Si | -0.845420 | -1.034052 | -0.451060 |
| C  | -2.220916 | -1.931113 | -1.427429 |
| C  | -2.562166 | -3.307180 | -1.225463 |
| C  | -3.810128 | -3.789185 | -1.681142 |
| C  | -4.702485 | -2.958056 | -2.364065 |
| C  | -4.325512 | -1.644829 | -2.666933 |
| C  | -3.089558 | -1.129584 | -2.232027 |
| Si | 0.932282  | 0.517265  | -0.764742 |
| C  | 1.817515  | 1.328610  | -2.249594 |
| C  | 1.960361  | 2.742507  | -2.416601 |
| C  | 2.647474  | 3.251707  | -3.541761 |
| C  | 3.162643  | 2.405639  | -4.526563 |
| C  | 3.000170  | 1.022950  | -4.390825 |
| C  | 2.352640  | 0.477013  | -3.265327 |
| Si | -0.937205 | 1.059469  | 0.383459  |
| C  | -1.616614 | 2.277276  | 1.697254  |
| C  | -3.013432 | 2.608510  | 1.690370  |
| C  | -3.445315 | 3.807592  | 2.297920  |
| C  | -2.539108 | 4.674918  | 2.916411  |
| C  | -1.186805 | 4.325665  | 2.986568  |

|   |           |           |           |
|---|-----------|-----------|-----------|
| C | -0.716517 | 3.131094  | 2.405160  |
| C | -4.052509 | 1.726139  | 1.090153  |
| H | -4.512391 | 4.037480  | 2.311717  |
| H | -2.893787 | 5.598015  | 3.380426  |
| H | -0.480880 | 4.958643  | 3.527653  |
| C | 0.710172  | 2.783031  | 2.647919  |
| C | 1.378025  | 3.778891  | -1.509939 |
| H | 2.736429  | 4.334393  | -3.650763 |
| H | 3.674103  | 2.820203  | -5.398165 |
| H | 3.387589  | 0.343223  | -5.152627 |
| C | 2.264851  | -1.020015 | -3.239324 |
| C | -1.628842 | -4.288652 | -0.611135 |
| H | -4.052827 | -4.843180 | -1.531018 |
| H | -5.662574 | -3.348794 | -2.708816 |
| H | -4.974426 | -1.008880 | -3.272063 |
| C | -2.711456 | 0.228582  | -2.718889 |
| C | -0.333586 | -2.008572 | 3.336499  |
| H | 1.206404  | -2.537493 | 5.392889  |
| H | 3.696692  | -2.515330 | 5.564323  |
| H | 5.057764  | -1.846365 | 3.568241  |
| C | 4.240290  | -1.092229 | 1.183958  |
| C | -3.583347 | 1.325840  | -2.579370 |
| C | -3.247918 | 2.574875  | -3.123855 |
| C | -2.045329 | 2.738463  | -3.830155 |
| C | -1.168642 | 1.649453  | -3.975493 |
| C | -1.500802 | 0.406583  | -3.421676 |
| H | -4.509912 | 1.197723  | -2.022528 |
| H | -3.926276 | 3.421075  | -2.991609 |
| H | -1.780990 | 3.712285  | -4.247533 |
| H | -0.221380 | 1.771233  | -4.503494 |
| H | -0.826862 | -0.441584 | -3.532400 |
| C | -2.091349 | -5.281353 | 0.282925  |
| C | -1.209289 | -6.207179 | 0.853161  |
| C | 0.157197  | -6.170495 | 0.525922  |
| C | 0.623931  | -5.215947 | -0.389936 |
| C | -0.260324 | -4.288261 | -0.958539 |
| H | -3.149085 | -5.303070 | 0.552985  |
| H | -1.585167 | -6.948767 | 1.561272  |
| H | 0.848471  | -6.886011 | 0.976543  |
| H | 1.678107  | -5.182583 | -0.669757 |
| H | 0.108666  | -3.580104 | -1.698704 |
| C | 1.734950  | 3.731345  | 2.447123  |
| C | 3.055497  | 3.443183  | 2.815954  |
| C | 3.364120  | 2.218142  | 3.429666  |
| C | 2.350583  | 1.270385  | 3.640138  |
| C | 1.038347  | 1.541635  | 3.230664  |
| H | 1.489798  | 4.683663  | 1.980681  |
| H | 3.841338  | 4.179465  | 2.630988  |
| H | 4.389811  | 1.995257  | 3.731415  |

|   |           |           |           |
|---|-----------|-----------|-----------|
| H | 2.578420  | 0.320522  | 4.119629  |
| H | 0.251512  | 0.806992  | 3.396538  |
| C | -5.172084 | 2.271268  | 0.421456  |
| C | -6.176349 | 1.441756  | -0.097307 |
| C | -6.066969 | 0.045634  | 0.016612  |
| C | -4.960203 | -0.509725 | 0.676854  |
| C | -3.974666 | 0.321964  | 1.223103  |
| H | -5.240504 | 3.353051  | 0.289976  |
| H | -7.031115 | 1.885281  | -0.613283 |
| H | -6.833925 | -0.603778 | -0.410418 |
| H | -4.857169 | -1.592066 | 0.767940  |
| H | -3.154709 | -0.118516 | 1.786630  |
| C | 2.191305  | 4.823283  | -1.019714 |
| C | 1.634613  | 5.892208  | -0.302041 |
| C | 0.254113  | 5.924457  | -0.044502 |
| C | -0.563648 | 4.887208  | -0.518235 |
| C | -0.008665 | 3.832833  | -1.256323 |
| H | 3.265921  | 4.794349  | -1.214161 |
| H | 2.281083  | 6.692260  | 0.066519  |
| H | -0.180675 | 6.747708  | 0.526531  |
| H | -1.636835 | 4.897497  | -0.320041 |
| H | -0.656736 | 3.069888  | -1.681892 |
| C | 3.100366  | -1.781970 | -2.398529 |
| C | 3.099599  | -3.183495 | -2.477190 |
| C | 2.253407  | -3.843637 | -3.380117 |
| C | 1.412335  | -3.093417 | -4.219659 |
| C | 1.431569  | -1.691778 | -4.158406 |
| H | 3.766849  | -1.277105 | -1.703333 |
| H | 3.761049  | -3.752179 | -1.820241 |
| H | 2.243938  | -4.934514 | -3.429750 |
| H | 0.750190  | -3.597017 | -4.927188 |
| H | 0.804809  | -1.106701 | -4.834768 |
| C | 5.261275  | -1.928281 | 0.686611  |
| C | 6.141101  | -1.473062 | -0.308905 |
| C | 6.015625  | -0.170143 | -0.817050 |
| C | 5.007733  | 0.674901  | -0.322062 |
| C | 4.130187  | 0.218977  | 0.671421  |
| H | 5.353474  | -2.943032 | 1.080975  |
| H | 6.918725  | -2.138205 | -0.691361 |
| H | 6.692527  | 0.181584  | -1.598634 |
| H | 4.894822  | 1.687049  | -0.715477 |
| H | 3.364409  | 0.880662  | 1.072282  |
| C | -1.013825 | -1.245883 | 4.312667  |
| C | -2.413029 | -1.263088 | 4.403398  |
| C | -3.159689 | -2.061348 | 3.524014  |
| C | -2.495005 | -2.833951 | 2.558849  |
| C | -1.095219 | -2.812758 | 2.464556  |
| H | -0.431539 | -0.625509 | 4.997184  |
| H | -2.916099 | -0.650616 | 5.154806  |



|   |           |           |          |
|---|-----------|-----------|----------|
| H | -4.249988 | -2.069944 | 3.579702 |
| H | -3.064482 | -3.457588 | 1.870713 |
| H | -0.594968 | -3.445512 | 1.733253 |

### C7

|    |           |           |           |
|----|-----------|-----------|-----------|
| C  | -2.846272 | -1.257781 | -3.741163 |
| C  | -1.975289 | -0.152996 | -3.597759 |
| C  | -2.518611 | 1.144017  | -3.710466 |
| C  | -3.873728 | 1.333371  | -4.004570 |
| C  | -4.713532 | 0.225395  | -4.202998 |
| C  | -4.202377 | -1.070134 | -4.045578 |
| C  | -0.494079 | -0.296515 | -3.604207 |
| C  | 0.408579  | 0.477421  | -2.800257 |
| C  | 1.712521  | 0.703179  | -3.342011 |
| C  | 2.148370  | -0.039247 | -4.465164 |
| C  | 1.326504  | -0.980881 | -5.079533 |
| C  | -0.009643 | -1.062454 | -4.683587 |
| Si | 0.229026  | 0.664204  | -0.860266 |
| Si | 2.237642  | 0.848819  | 0.455833  |
| Si | 2.763781  | -1.304015 | 0.105365  |
| C  | 4.542167  | -1.891830 | 0.702781  |
| C  | 5.598197  | -2.043067 | -0.256851 |
| C  | 6.835696  | -2.617247 | 0.104162  |
| C  | 7.072749  | -3.075090 | 1.401959  |
| C  | 6.048795  | -2.976421 | 2.345268  |
| C  | 4.792725  | -2.411675 | 2.018176  |
| C  | 5.503476  | -1.668997 | -1.705744 |
| C  | 6.521873  | -0.886101 | -2.294590 |
| C  | 6.575651  | -0.692270 | -3.682356 |
| C  | 5.610426  | -1.280640 | -4.516024 |
| C  | 4.580760  | -2.042517 | -3.941794 |
| C  | 4.525300  | -2.227888 | -2.553650 |
| C  | 3.793264  | -2.421910 | 3.130694  |
| C  | 3.034200  | -1.290968 | 3.494314  |
| C  | 2.178962  | -1.318727 | 4.605821  |
| C  | 2.071280  | -2.475715 | 5.390090  |
| C  | 2.816292  | -3.614274 | 5.042606  |
| C  | 3.656352  | -3.587626 | 3.922535  |
| C  | 2.592608  | 1.831335  | -2.937916 |
| C  | 3.994396  | 1.737501  | -3.089189 |
| C  | 4.793254  | 2.882431  | -3.072645 |
| C  | 4.220247  | 4.142488  | -2.842608 |
| C  | 2.841818  | 4.238366  | -2.605412 |
| C  | 2.031092  | 3.098286  | -2.660674 |
| Si | -1.928704 | 1.130595  | 0.000347  |
| Si | -0.932534 | -1.282013 | -0.097071 |
| C  | -0.264347 | -2.806094 | 0.858979  |
| C  | -0.314631 | -2.894480 | 2.281591  |
| C  | 0.234927  | -4.014926 | 2.941012  |

|    |           |           |           |
|----|-----------|-----------|-----------|
| C  | 0.861855  | -5.036706 | 2.229247  |
| C  | 0.905400  | -4.967370 | 0.834740  |
| C  | 0.339503  | -3.880499 | 0.139470  |
| C  | -0.871694 | -1.831911 | 3.155961  |
| C  | -1.724287 | -2.164701 | 4.232110  |
| C  | -2.196301 | -1.175176 | 5.105928  |
| C  | -1.842711 | 0.168292  | 4.901864  |
| C  | -1.002308 | 0.509214  | 3.833440  |
| C  | -0.498493 | -0.484013 | 2.985080  |
| C  | 0.391896  | -3.974884 | -1.344425 |
| C  | 1.614531  | -4.299223 | -1.972133 |
| C  | 1.679792  | -4.528829 | -3.350978 |
| C  | 0.509389  | -4.473385 | -4.125694 |
| C  | -0.712594 | -4.171156 | -3.510039 |
| C  | -0.772784 | -3.903126 | -2.133201 |
| C  | -2.626014 | 2.538765  | 1.101216  |
| C  | -3.518996 | 2.319859  | 2.208936  |
| C  | -3.790158 | 3.385313  | 3.095134  |
| C  | -3.313057 | 4.677571  | 2.860995  |
| C  | -2.586768 | 4.932579  | 1.699001  |
| C  | -2.228255 | 3.885032  | 0.819750  |
| C  | -4.392052 | 1.113251  | 2.412068  |
| C  | -5.784985 | 1.365068  | 2.503775  |
| C  | -6.702485 | 0.329286  | 2.710025  |
| C  | -6.248210 | -0.990422 | 2.852786  |
| C  | -4.876477 | -1.253227 | 2.765664  |
| C  | -3.958457 | -0.218856 | 2.525952  |
| C  | -1.550994 | 4.315899  | -0.438389 |
| C  | -2.033642 | 3.913512  | -1.703726 |
| C  | -1.520372 | 4.480525  | -2.880154 |
| C  | -0.514087 | 5.455358  | -2.818349 |
| C  | -0.013106 | 5.848918  | -1.567586 |
| C  | -0.523028 | 5.283317  | -0.394905 |
| Si | -3.061977 | -0.697921 | -0.666120 |
| C  | -4.899686 | -1.291279 | -0.609447 |
| C  | -6.051765 | -0.448561 | -0.822174 |
| C  | -7.347020 | -0.989044 | -0.644261 |
| C  | -7.558872 | -2.331416 | -0.338107 |
| C  | -6.456471 | -3.179294 | -0.246766 |
| C  | -5.142675 | -2.683902 | -0.385270 |
| C  | -6.064198 | 0.968198  | -1.299501 |
| C  | -5.291014 | 1.984741  | -0.723300 |
| C  | -5.390913 | 3.318188  | -1.142081 |
| C  | -6.273912 | 3.665447  | -2.174517 |
| C  | -7.065427 | 2.664832  | -2.763649 |
| C  | -6.966805 | 1.338225  | -2.325887 |
| C  | -4.109151 | -3.767317 | -0.339324 |
| C  | -4.150458 | -4.754598 | -1.352017 |
| C  | -3.352497 | -5.902665 | -1.268430 |

|   |           |           |           |
|---|-----------|-----------|-----------|
| C | -2.511187 | -6.089305 | -0.160195 |
| C | -2.462761 | -5.117584 | 0.847824  |
| C | -3.248444 | -3.959741 | 0.755775  |
| C | 2.943557  | 2.606880  | 0.933227  |
| C | 4.220002  | 3.087425  | 0.479094  |
| C | 4.432832  | 4.478816  | 0.358258  |
| C | 3.465451  | 5.404332  | 0.755512  |
| C | 2.358294  | 4.942963  | 1.472340  |
| C | 2.130745  | 3.558166  | 1.640481  |
| C | 5.420696  | 2.214324  | 0.376283  |
| C | 6.543146  | 2.555425  | -0.416363 |
| C | 7.753964  | 1.864370  | -0.298808 |
| C | 7.877597  | 0.802978  | 0.613833  |
| C | 6.773802  | 0.439146  | 1.396097  |
| C | 5.567537  | 1.139562  | 1.282035  |
| C | 1.332112  | 3.199238  | 2.851017  |
| C | 0.212488  | 3.951767  | 3.269925  |
| C | -0.281263 | 3.864722  | 4.579273  |
| C | 0.337658  | 3.019954  | 5.513118  |
| C | 1.432451  | 2.238277  | 5.107446  |
| C | 1.915077  | 2.317541  | 3.795418  |
| H | 7.613227  | -2.708770 | -0.657317 |
| H | 8.038782  | -3.507687 | 1.672700  |
| H | 6.218946  | -3.321789 | 3.367418  |
| H | 3.137935  | 0.157133  | -4.873622 |
| H | 1.693315  | -1.573031 | -5.920690 |
| H | -0.715522 | -1.662287 | -5.259884 |
| H | 1.363200  | -5.773840 | 0.259417  |
| H | 1.314690  | -5.878149 | 2.757014  |
| H | 0.226465  | -4.033619 | 4.029244  |
| H | -8.202610 | -0.320364 | -0.746548 |
| H | -8.571415 | -2.714377 | -0.193763 |
| H | -6.593347 | -4.244817 | -0.055040 |
| H | -2.297205 | 5.953797  | 1.446095  |
| H | -3.555706 | 5.488142  | 3.551565  |
| H | -4.427564 | 3.190287  | 3.959055  |
| H | 4.219612  | -4.480664 | 3.644162  |
| H | 2.732791  | -4.529215 | 5.634949  |
| H | 1.402757  | -2.492166 | 6.253962  |
| H | 1.590194  | -0.435903 | 4.849168  |
| H | 3.118392  | -0.381427 | 2.903868  |
| H | 7.270562  | -0.428783 | -1.648947 |
| H | 7.372764  | -0.080203 | -4.111886 |
| H | 5.654836  | -1.138366 | -5.598555 |
| H | 3.811074  | -2.495115 | -4.568649 |
| H | 3.731734  | -2.837657 | -2.129307 |
| H | 5.400011  | 4.839222  | 0.007497  |
| H | 3.643131  | 6.475918  | 0.637379  |
| H | 1.736198  | 5.654356  | 2.019696  |

|   |           |           |           |
|---|-----------|-----------|-----------|
| H | 6.464736  | 3.376043  | -1.126664 |
| H | 8.603242  | 2.155820  | -0.922194 |
| H | 8.820595  | 0.260093  | 0.709154  |
| H | 6.844262  | -0.392827 | 2.095762  |
| H | 4.740078  | 0.881873  | 1.942019  |
| H | -0.258874 | 4.636604  | 2.569689  |
| H | -1.151201 | 4.460672  | 4.862497  |
| H | -0.030602 | 2.963514  | 6.539589  |
| H | 1.927967  | 1.576136  | 5.820101  |
| H | 2.801737  | 1.752650  | 3.508877  |
| H | -2.856380 | 3.202155  | -1.770537 |
| H | -1.923749 | 4.173001  | -3.846915 |
| H | -0.115532 | 5.893956  | -3.734810 |
| H | 0.783787  | 6.591609  | -1.501002 |
| H | -0.116341 | 5.586982  | 0.567972  |
| H | -2.903601 | -0.451084 | 2.467382  |
| H | -4.508399 | -2.270346 | 2.895590  |
| H | -6.956071 | -1.804927 | 3.016337  |
| H | -7.770245 | 0.554292  | 2.754267  |
| H | -6.144786 | 2.387328  | 2.376862  |
| H | -2.016183 | -3.207925 | 4.374491  |
| H | -2.860477 | -1.451143 | 5.927878  |
| H | -2.224222 | 0.949013  | 5.562960  |
| H | -0.731871 | 1.543718  | 3.654684  |
| H | 0.244385  | -0.218401 | 2.229953  |
| H | 2.510321  | -4.374433 | -1.355479 |
| H | 2.640574  | -4.759736 | -3.815876 |
| H | 0.549161  | -4.673650 | -5.198641 |
| H | -1.630658 | -4.166859 | -4.101388 |
| H | -1.732031 | -3.707082 | -1.657770 |
| H | 4.453296  | 0.763746  | -3.243402 |
| H | 5.868021  | 2.781321  | -3.230471 |
| H | 4.843040  | 5.039923  | -2.830585 |
| H | 2.390541  | 5.207569  | -2.398302 |
| H | 0.950228  | 3.197443  | -2.555735 |
| H | -1.844177 | 1.991326  | -3.606634 |
| H | -4.281463 | 2.342617  | -4.087244 |
| H | -5.760769 | 0.375800  | -4.460273 |
| H | -4.857969 | -1.937110 | -4.153731 |
| H | -2.442703 | -2.260525 | -3.625625 |
| H | -7.577512 | 0.567412  | -2.799164 |
| H | -7.760699 | 2.916699  | -3.567729 |
| H | -6.355019 | 4.702014  | -2.508692 |
| H | -4.782383 | 4.076919  | -0.647172 |
| H | -4.647978 | 1.733264  | 0.101641  |
| H | -3.195403 | -3.209049 | 1.542785  |
| H | -1.792904 | -5.241031 | 1.697535  |
| H | -1.881800 | -6.978483 | -0.090338 |
| H | -3.383459 | -6.646219 | -2.067632 |

H -4.826527 -4.613043 -2.198214

### C7-TS

C 6.679914 -0.962325 -2.131399  
C 5.639221 -1.692983 -1.513902  
C 4.667890 -2.291940 -2.342442  
C 4.742186 -2.188124 -3.738407  
C 5.792409 -1.475665 -4.339427  
C 6.756806 -0.855876 -3.527748  
C 5.691097 -1.977322 -0.044476  
C 4.599714 -1.786336 0.868642  
C 4.809301 -2.249559 2.211707  
C 6.056707 -2.788667 2.608666  
C 7.115730 -2.919010 1.709209  
C 6.919661 -2.523726 0.384889  
Si 2.826044 -1.245933 0.188398  
Si 2.266116 0.913964 0.470817  
C 2.938843 2.679896 0.973615  
C 4.212236 3.181795 0.523075  
C 4.384972 4.573496 0.358682  
C 3.391248 5.484941 0.729633  
C 2.293606 5.015098 1.454933  
C 2.098486 3.627917 1.647395  
C 5.433433 2.333907 0.468700  
C 6.574144 2.687043 -0.292549  
C 7.785807 2.003451 -0.148789  
C 7.896506 0.943788 0.767769  
C 6.779709 0.577534 1.529760  
C 5.569665 1.265741 1.383448  
C 1.228194 3.269423 2.808602  
C 0.018244 3.940631 3.095028  
C -0.580382 3.850643 4.360589  
C 0.026669 3.101367 5.379883  
C 1.217014 2.406471 5.104898  
C 1.799253 2.474465 3.833411  
C 3.771048 -2.242835 3.288160  
C 3.010679 -1.104972 3.623932  
C 2.123732 -1.125001 4.710265  
C 1.974084 -2.281680 5.487677  
C 2.721359 -3.426719 5.167526  
C 3.602502 -3.405265 4.078780  
Si 0.226302 0.749579 -0.859972  
C 0.463765 0.608759 -2.797027  
C 1.801647 0.624495 -3.299966  
C 2.155448 -0.200384 -4.392226  
C 1.203044 -0.971938 -5.056816  
C -0.144111 -0.796791 -4.731438  
C -0.524699 0.020498 -3.649426  
C 2.802833 1.666237 -2.953730

|    |           |           |           |
|----|-----------|-----------|-----------|
| C  | 4.184777  | 1.387681  | -2.933806 |
| C  | 5.119152  | 2.422210  | -3.004438 |
| C  | 4.696670  | 3.761615  | -3.052432 |
| C  | 3.325793  | 4.053153  | -3.022614 |
| C  | 2.387030  | 3.012912  | -2.988704 |
| C  | -1.950395 | 0.409616  | -3.598584 |
| C  | -2.282580 | 1.774653  | -3.475794 |
| C  | -3.607303 | 2.199789  | -3.634999 |
| C  | -4.622917 | 1.272820  | -3.910443 |
| C  | -4.316763 | -0.094041 | -3.976654 |
| C  | -2.988710 | -0.524083 | -3.820459 |
| Si | -2.016478 | 1.105445  | -0.048976 |
| Si | -0.930143 | -1.265518 | -0.252991 |
| C  | -0.170313 | -2.818686 | 0.563701  |
| C  | -0.098209 | -2.964570 | 1.978959  |
| C  | 0.583388  | -4.065034 | 2.540015  |
| C  | 1.206496  | -5.013964 | 1.728102  |
| C  | 1.108152  | -4.899518 | 0.338487  |
| C  | 0.419780  | -3.825480 | -0.258870 |
| C  | -0.670720 | -1.983922 | 2.939013  |
| C  | -1.445806 | -2.424255 | 4.034047  |
| C  | -1.923578 | -1.512850 | 4.986740  |
| C  | -1.655568 | -0.141166 | 4.846182  |
| C  | -0.897806 | 0.307947  | 3.756599  |
| C  | -0.388349 | -0.608772 | 2.828484  |
| C  | 0.315799  | -3.849717 | -1.743783 |
| C  | 1.440900  | -4.178356 | -2.532497 |
| C  | 1.328362  | -4.336481 | -3.918810 |
| C  | 0.081735  | -4.184194 | -4.547947 |
| C  | -1.043652 | -3.864313 | -3.776808 |
| C  | -0.927246 | -3.694034 | -2.390337 |
| Si | -3.095682 | -0.754089 | -0.751838 |
| C  | -4.892508 | -1.479791 | -0.590104 |
| C  | -6.110471 | -0.713517 | -0.716272 |
| C  | -7.354985 | -1.337191 | -0.457037 |
| C  | -7.464063 | -2.690906 | -0.152832 |
| C  | -6.306933 | -3.465301 | -0.145178 |
| C  | -5.038430 | -2.887493 | -0.367037 |
| C  | -6.260715 | 0.710988  | -1.142621 |
| C  | -5.525765 | 1.760025  | -0.576441 |
| C  | -5.798744 | 3.099622  | -0.876708 |
| C  | -6.816775 | 3.422936  | -1.785050 |
| C  | -7.557270 | 2.387387  | -2.380636 |
| C  | -7.284973 | 1.050987  | -2.060906 |
| C  | -3.955382 | -3.920819 | -0.403222 |
| C  | -4.009451 | -4.883224 | -1.439153 |
| C  | -3.164258 | -5.999163 | -1.426141 |
| C  | -2.268699 | -6.183986 | -0.361067 |
| C  | -2.213059 | -5.240411 | 0.672512  |

|   |           |           |           |
|---|-----------|-----------|-----------|
| C | -3.041606 | -4.109365 | 0.647273  |
| C | -2.792134 | 2.423563  | 1.112004  |
| C | -2.540689 | 3.787919  | 0.782487  |
| C | -3.010529 | 4.833623  | 1.603150  |
| C | -3.706070 | 4.550166  | 2.780382  |
| C | -4.034131 | 3.224127  | 3.073620  |
| C | -3.659750 | 2.153926  | 2.229186  |
| C | -1.821787 | 4.236701  | -0.454896 |
| C | -2.544108 | 4.774343  | -1.539321 |
| C | -1.870629 | 5.363109  | -2.621054 |
| C | -0.469834 | 5.459461  | -2.610904 |
| C | 0.253202  | 4.932795  | -1.528782 |
| C | -0.418843 | 4.298042  | -0.478356 |
| C | -4.416679 | 0.879052  | 2.468884  |
| C | -3.868130 | -0.414264 | 2.539880  |
| C | -4.684637 | -1.525898 | 2.799735  |
| C | -6.067653 | -1.382064 | 2.955565  |
| C | -6.637850 | -0.104343 | 2.854058  |
| C | -5.821826 | 1.007596  | 2.621703  |
| H | 7.721822  | -2.648890 | -0.345548 |
| H | 8.074382  | -3.331036 | 2.032886  |
| H | 6.189142  | -3.091256 | 3.649755  |
| H | 3.185130  | -0.176567 | -4.747467 |
| H | 1.493076  | -1.620895 | -5.885218 |
| H | -0.921355 | -1.242976 | -5.353537 |
| H | 1.549739  | -5.662617 | -0.304878 |
| H | 1.759100  | -5.842434 | 2.175991  |
| H | 0.670769  | -4.126303 | 3.623541  |
| H | -8.255067 | -0.722446 | -0.485742 |
| H | -8.438732 | -3.137188 | 0.055766  |
| H | -6.361946 | -4.538592 | 0.043515  |
| H | -2.800212 | 5.865021  | 1.313731  |
| H | -4.026519 | 5.356032  | 3.444365  |
| H | -4.638990 | 2.999796  | 3.953651  |
| H | 4.172237  | -4.300673 | 3.821926  |
| H | 2.611536  | -4.340220 | 5.757867  |
| H | 1.274171  | -2.290548 | 6.325795  |
| H | 1.537435  | -0.236782 | 4.936619  |
| H | 3.114737  | -0.197769 | 3.032232  |
| H | 7.421461  | -0.471098 | -1.500872 |
| H | 7.568438  | -0.282666 | -3.982421 |
| H | 5.852864  | -1.394148 | -5.427241 |
| H | 3.972796  | -2.662053 | -4.350525 |
| H | 3.861275  | -2.859822 | -1.884169 |
| H | 5.343195  | 4.952062  | 0.002106  |
| H | 3.537877  | 6.556507  | 0.576746  |
| H | 1.624311  | 5.719029  | 1.953694  |
| H | 6.506736  | 3.503205  | -1.009026 |
| H | 8.646793  | 2.301180  | -0.752883 |

|   |           |           |           |
|---|-----------|-----------|-----------|
| H | 8.841219  | 0.408283  | 0.885844  |
| H | 6.841951  | -0.247428 | 2.237932  |
| H | 4.729132  | 1.002748  | 2.024236  |
| H | -0.443773 | 4.564450  | 2.331473  |
| H | -1.518712 | 4.376537  | 4.544280  |
| H | -0.423694 | 3.052248  | 6.373581  |
| H | 1.702713  | 1.818569  | 5.886218  |
| H | 2.747557  | 1.972841  | 3.640938  |
| H | -3.633009 | 4.728961  | -1.534630 |
| H | -2.442589 | 5.763495  | -3.461356 |
| H | 0.053912  | 5.941558  | -3.439369 |
| H | 1.338651  | 5.002626  | -1.487962 |
| H | 0.150165  | 3.872003  | 0.341303  |
| H | -2.801932 | -0.558434 | 2.428436  |
| H | -4.227077 | -2.509883 | 2.892693  |
| H | -6.695677 | -2.256097 | 3.136798  |
| H | -7.717893 | 0.028334  | 2.946744  |
| H | -6.275790 | 1.993991  | 2.516962  |
| H | -1.668188 | -3.489464 | 4.133638  |
| H | -2.525453 | -1.872077 | 5.824404  |
| H | -2.043534 | 0.576147  | 5.572242  |
| H | -0.694348 | 1.365530  | 3.623731  |
| H | 0.305697  | -0.263146 | 2.061508  |
| H | 2.403517  | -4.323068 | -2.043001 |
| H | 2.213638  | -4.588866 | -4.506635 |
| H | -0.009516 | -4.317878 | -5.628132 |
| H | -2.025295 | -3.773486 | -4.247354 |
| H | -1.818966 | -3.516778 | -1.796124 |
| H | 4.515153  | 0.355276  | -2.890282 |
| H | 6.180882  | 2.175877  | -3.005136 |
| H | 5.429790  | 4.569755  | -3.111598 |
| H | 2.985180  | 5.090686  | -3.065036 |
| H | 1.322659  | 3.228323  | -3.061520 |
| H | -1.491627 | 2.504150  | -3.298537 |
| H | -3.845051 | 3.260843  | -3.556924 |
| H | -5.646731 | 1.613459  | -4.046151 |
| H | -5.109274 | -0.826995 | -4.142646 |
| H | -2.735837 | -1.583478 | -3.889790 |
| H | -7.861135 | 0.254407  | -2.535660 |
| H | -8.349017 | 2.619865  | -3.096472 |
| H | -7.040428 | 4.465915  | -2.020008 |
| H | -5.228973 | 3.879225  | -0.368542 |
| H | -4.772810 | 1.523886  | 0.153974  |
| H | -2.979503 | -3.377166 | 1.450354  |
| H | -1.501659 | -5.361922 | 1.488003  |
| H | -1.604572 | -7.050210 | -0.343691 |
| H | -3.203073 | -6.720577 | -2.244967 |
| H | -4.728558 | -4.745587 | -2.249643 |



## C10

|    |           |           |           |
|----|-----------|-----------|-----------|
| C  | 2.657931  | 2.663973  | 2.828319  |
| C  | 3.524004  | 3.083092  | 1.801293  |
| C  | 4.909160  | 2.862862  | 1.953787  |
| C  | 5.418196  | 2.269954  | 3.117354  |
| C  | 4.552317  | 1.930045  | 4.168267  |
| C  | 3.170175  | 2.127376  | 4.016804  |
| C  | 3.004311  | 3.966896  | 0.717350  |
| C  | 1.914667  | 3.661770  | -0.156630 |
| C  | 1.463405  | 4.697741  | -1.034606 |
| C  | 2.059534  | 5.979140  | -0.993969 |
| C  | 3.134346  | 6.252633  | -0.147482 |
| C  | 3.607392  | 5.243170  | 0.691619  |
| Si | 1.083374  | 1.938117  | -0.246275 |
| Si | -1.127248 | 1.900329  | 0.222431  |
| C  | -2.029598 | 3.588190  | 0.154128  |
| C  | -1.624415 | 4.627865  | 1.049807  |
| C  | -2.277540 | 5.881472  | 1.031650  |
| C  | -3.363889 | 6.120385  | 0.188993  |
| C  | -3.792058 | 5.105163  | -0.667295 |
| C  | -3.132733 | 3.857438  | -0.714537 |
| C  | -3.614627 | 2.964683  | -1.808531 |
| C  | -4.990837 | 2.700658  | -1.972324 |
| C  | -5.471206 | 2.093568  | -3.140664 |
| C  | -4.585884 | 1.780433  | -4.184002 |
| C  | -3.212050 | 2.021810  | -4.021314 |
| C  | -2.727469 | 2.575492  | -2.828936 |
| Si | 2.212274  | 0.031078  | 0.253860  |
| C  | 4.125573  | -0.043018 | 0.182284  |
| C  | 4.917448  | 0.776695  | -0.681480 |
| C  | 6.327070  | 0.709279  | -0.638230 |
| C  | 6.985669  | -0.182693 | 0.208855  |
| C  | 6.229016  | -1.003016 | 1.046452  |
| C  | 4.817347  | -0.927871 | 1.069282  |
| C  | 4.394397  | 1.655802  | -1.767882 |
| C  | 4.864793  | 2.977586  | -1.917044 |
| C  | 4.590711  | 3.710814  | -3.079607 |
| C  | 3.877330  | 3.116602  | -4.132088 |
| C  | 3.387191  | 1.809086  | -3.983879 |
| C  | 3.612461  | 1.099031  | -2.797304 |
| Si | 1.139898  | -1.899390 | -0.244197 |
| C  | 2.220694  | -3.480034 | -0.173818 |
| C  | 1.941232  | -4.585013 | 0.688929  |
| C  | 2.745027  | -5.744720 | 0.651300  |
| C  | 3.852708  | -5.831733 | -0.192720 |
| C  | 4.150642  | -4.756346 | -1.030736 |
| C  | 3.341321  | -3.597016 | -1.056442 |
| C  | 0.911597  | -4.601676 | 1.768008  |
| C  | 0.042640  | -5.702521 | 1.920300  |

|    |           |           |           |
|----|-----------|-----------|-----------|
| C  | -0.735256 | -5.849217 | 3.076804  |
| C  | -0.622887 | -4.917013 | 4.119958  |
| C  | 0.223254  | -3.806383 | 3.967681  |
| C  | 0.955859  | -3.631433 | 2.786453  |
| Si | -1.077420 | -1.941581 | 0.254121  |
| Si | -2.204113 | -0.042126 | -0.239509 |
| C  | -4.114266 | -0.160209 | -0.183369 |
| C  | -4.925594 | 0.640232  | 0.679513  |
| C  | -6.333508 | 0.549664  | 0.624783  |
| C  | -6.969919 | -0.349345 | -0.231564 |
| C  | -6.193428 | -1.155045 | -1.065474 |
| C  | -4.783204 | -1.055979 | -1.077055 |
| C  | -4.424738 | 1.516134  | 1.778681  |
| C  | -4.913971 | 2.830192  | 1.935927  |
| C  | -4.665925 | 3.552074  | 3.111240  |
| C  | -3.958774 | 2.954291  | 4.166431  |
| C  | -3.446961 | 1.656158  | 4.008479  |
| C  | -3.647087 | 0.958180  | 2.810234  |
| C  | -2.106500 | -3.556374 | 0.166257  |
| C  | -1.782362 | -4.651408 | -0.694672 |
| C  | -2.547005 | -5.837703 | -0.665219 |
| C  | -3.663257 | -5.961246 | 0.162523  |
| C  | -4.007871 | -4.895763 | 0.994637  |
| C  | -3.234510 | -3.712507 | 1.033492  |
| C  | -0.746974 | -4.635689 | -1.768413 |
| C  | 0.166700  | -5.701145 | -1.908433 |
| C  | 0.953342  | -5.826348 | -3.061635 |
| C  | 0.805593  | -4.909688 | -4.114019 |
| C  | -0.087111 | -3.834417 | -3.974655 |
| C  | -0.828032 | -3.677661 | -2.796128 |
| H  | -6.922909 | 1.163164  | 1.308404  |
| H  | -8.059934 | -0.421642 | -0.249363 |
| H  | -6.673711 | -1.842802 | -1.763535 |
| C  | -4.145120 | -1.859681 | -2.168289 |
| C  | -0.620416 | 4.501684  | 2.153405  |
| H  | -1.949094 | 6.650837  | 1.732565  |
| H  | -3.872968 | 7.086988  | 0.201652  |
| H  | -4.620564 | 5.283720  | -1.355003 |
| H  | 4.426039  | 5.446739  | 1.384170  |
| H  | 3.599443  | 7.241236  | -0.143552 |
| H  | 1.696926  | 6.745075  | -1.681602 |
| C  | 0.466790  | 4.547583  | -2.142072 |
| H  | 6.900192  | 1.337032  | -1.322859 |
| H  | 8.076840  | -0.236499 | 0.218264  |
| H  | 6.726238  | -1.683253 | 1.740106  |
| C  | 4.202625  | -1.737956 | 2.168748  |
| H  | 2.514102  | -6.562099 | 1.336614  |
| H  | 4.476465  | -6.728683 | -0.199677 |
| H  | 4.993145  | -4.819864 | -1.721515 |

|   |           |           |           |
|---|-----------|-----------|-----------|
| C | 3.714612  | -2.644504 | -2.150821 |
| C | -3.652376 | -2.779845 | 2.129065  |
| H | -4.857871 | -4.985273 | 1.673285  |
| H | -4.257304 | -6.878173 | 0.160772  |
| H | -2.280137 | -6.646796 | -1.347397 |
| H | 5.452134  | 3.428093  | -1.116199 |
| H | 4.944842  | 4.739922  | -3.166536 |
| H | 3.680691  | 3.677250  | -5.048275 |
| H | 2.819109  | 1.337650  | -4.788524 |
| H | 3.243052  | 0.083951  | -2.687964 |
| H | -5.684668 | 2.976946  | -1.177450 |
| H | -6.536820 | 1.877198  | -3.239239 |
| H | -4.959662 | 1.327081  | -5.104402 |
| H | -2.508628 | 1.770973  | -4.818082 |
| H | -1.667065 | 2.770875  | -2.705835 |
| H | 0.253130  | -6.437397 | -1.108676 |
| H | 1.670746  | -6.645463 | -3.141168 |
| H | 1.400511  | -5.015991 | -5.023481 |
| H | -0.203882 | -3.105781 | -4.779700 |
| H | -1.525955 | -2.852281 | -2.693602 |
| H | -0.017058 | -6.447990 | 1.126553  |
| H | -1.418331 | -6.696269 | 3.166104  |
| H | -1.211013 | -5.039129 | 5.031916  |
| H | 0.311854  | -3.065909 | 4.765346  |
| H | 1.620313  | -2.780210 | 2.674306  |
| H | -5.494350 | 3.282808  | 1.131114  |
| H | -5.035145 | 4.575194  | 3.205798  |
| H | -3.783529 | 3.505889  | 5.092407  |
| H | -2.883220 | 1.181862  | 4.814589  |
| H | -3.262982 | -0.050426 | 2.693546  |
| H | 5.588092  | 3.161867  | 1.154454  |
| H | 6.490808  | 2.086682  | 3.206278  |
| H | 4.947561  | 1.489467  | 5.085848  |
| H | 2.481924  | 1.856586  | 4.820280  |
| H | 1.590835  | 2.829205  | 2.717088  |
| C | -0.583915 | 5.476965  | -2.297013 |
| C | -1.328150 | 5.521707  | -3.484274 |
| C | -1.024818 | 4.653546  | -4.544878 |
| C | -0.008573 | 3.698499  | -4.385333 |
| C | 0.713921  | 3.634133  | -3.185668 |
| H | -0.815297 | 6.161589  | -1.480025 |
| H | -2.147793 | 6.237020  | -3.578294 |
| H | -1.596654 | 4.701623  | -5.473735 |
| H | 0.226246  | 3.000339  | -5.192562 |
| H | 1.514137  | 2.911485  | -3.067412 |
| C | -4.441410 | -3.231044 | -2.318784 |
| C | -4.094641 | -3.911761 | -3.494220 |
| C | -3.466021 | -3.230897 | -4.548666 |
| C | -3.130516 | -1.876781 | -4.392614 |

|   |           |           |           |
|---|-----------|-----------|-----------|
| C | -3.446732 | -1.206483 | -3.202623 |
| H | -4.943933 | -3.759660 | -1.507877 |
| H | -4.317021 | -4.976997 | -3.584263 |
| H | -3.211778 | -3.760202 | -5.469166 |
| H | -2.620089 | -1.337335 | -5.194205 |
| H | -3.205787 | -0.155363 | -3.086693 |
| C | 5.048118  | -2.205428 | -2.295198 |
| C | 5.468791  | -1.572790 | -3.473170 |
| C | 4.572223  | -1.386399 | -4.537119 |
| C | 3.233550  | -1.781101 | -4.387585 |
| C | 2.805949  | -2.382186 | -3.195330 |
| H | 5.752318  | -2.362503 | -1.477178 |
| H | 6.500804  | -1.226310 | -3.558205 |
| H | 4.907371  | -0.907888 | -5.459510 |
| H | 2.516109  | -1.620306 | -5.196060 |
| H | 1.775482  | -2.702143 | -3.084533 |
| C | 0.391171  | 5.470649  | 2.322814  |
| C | 1.131760  | 5.528578  | 3.511684  |
| C | 0.861499  | 4.634368  | 4.559727  |
| C | -0.113315 | 3.639653  | 4.383974  |
| C | -0.829142 | 3.560974  | 3.181033  |
| H | 0.592346  | 6.177578  | 1.516795  |
| H | 1.920526  | 6.276181  | 3.617887  |
| H | 1.428919  | 4.693057  | 5.490695  |
| H | -0.319809 | 2.920180  | 5.180089  |
| H | -1.596113 | 2.804812  | 3.049611  |
| C | -4.996378 | -2.365633 | 2.244111  |
| C | -5.458928 | -1.759325 | 3.420194  |
| C | -4.593714 | -1.574324 | 4.510178  |
| C | -3.245497 | -1.946391 | 4.391205  |
| C | -2.776807 | -2.522170 | 3.201809  |
| H | -5.675200 | -2.521638 | 1.404941  |
| H | -6.498307 | -1.430479 | 3.482270  |
| H | -4.960945 | -1.115772 | 5.430453  |
| H | -2.552920 | -1.788776 | 5.221733  |
| H | -1.740618 | -2.830359 | 3.114249  |
| C | 4.527002  | -3.102491 | 2.324433  |
| C | 4.204488  | -3.782240 | 3.507342  |
| C | 3.568969  | -3.108105 | 4.561968  |
| C | 3.205032  | -1.762094 | 4.400830  |
| C | 3.501004  | -1.091567 | 3.205818  |
| H | 5.031411  | -3.626428 | 1.511559  |
| H | 4.450947  | -4.841720 | 3.603091  |
| H | 3.333625  | -3.636598 | 5.487947  |
| H | 2.690829  | -1.228113 | 5.203667  |
| H | 3.240411  | -0.044858 | 3.088487  |

**D1**

|   |           |           |          |
|---|-----------|-----------|----------|
| C | -1.062639 | -3.300885 | 0.088529 |
|---|-----------|-----------|----------|

|    |           |           |           |
|----|-----------|-----------|-----------|
| C  | 0.061219  | -3.134684 | 0.933264  |
| C  | -0.102331 | -2.975814 | 2.330321  |
| C  | -1.401533 | -2.971973 | 2.868459  |
| C  | -2.520457 | -3.105305 | 2.036798  |
| C  | -2.348765 | -3.275965 | 0.655484  |
| C  | 1.422245  | -3.028104 | 0.323985  |
| C  | 1.953954  | -1.745919 | 0.005176  |
| C  | 3.238948  | -1.665051 | -0.594097 |
| C  | 3.971301  | -2.833706 | -0.865947 |
| C  | 3.440732  | -4.092637 | -0.548823 |
| C  | 2.169658  | -4.183317 | 0.040104  |
| C  | 3.810542  | -0.326235 | -0.956731 |
| C  | 3.470540  | 0.272495  | -2.198750 |
| C  | 4.059401  | 1.501667  | -2.546334 |
| C  | 4.971345  | 2.129915  | -1.687738 |
| C  | 5.289854  | 1.541252  | -0.455759 |
| C  | 4.716118  | 0.316875  | -0.072842 |
| Si | 1.084499  | -0.096174 | 0.365884  |
| Si | -1.084538 | 0.096279  | 0.366606  |
| C  | -1.953986 | 1.745900  | 0.005247  |
| C  | -3.238924 | 1.664921  | -0.594147 |
| C  | -3.971197 | 2.833548  | -0.866332 |
| C  | -3.440623 | 4.092540  | -0.549441 |
| C  | -2.169608 | 4.183321  | 0.039582  |
| C  | -1.422287 | 3.028139  | 0.323830  |
| C  | -3.810518 | 0.326094  | -0.956725 |
| C  | -3.470003 | -0.272833 | -2.198515 |
| C  | -4.058924 | -1.501923 | -2.546277 |
| C  | -4.971430 | -2.129901 | -1.688079 |
| C  | -5.290404 | -1.541071 | -0.456301 |
| C  | -4.716606 | -0.316779 | -0.073205 |
| C  | -0.061270 | 3.134777  | 0.933124  |
| C  | 1.062574  | 3.300878  | 0.088371  |
| C  | 2.348713  | 3.275982  | 0.655311  |
| C  | 2.520427  | 3.105410  | 2.036628  |
| C  | 1.401508  | 2.972185  | 2.868316  |
| C  | 0.102298  | 2.976032  | 2.330200  |
| H  | 4.956004  | -2.747762 | -1.332120 |
| H  | 4.012733  | -4.998564 | -0.760847 |
| H  | 1.744804  | -5.159610 | 0.286081  |
| H  | -4.955861 | 2.747546  | -1.332580 |
| H  | -4.012580 | 4.998428  | -0.761746 |
| H  | -1.744724 | 5.159656  | 0.285340  |
| C  | 0.889918  | 3.437501  | -1.411979 |
| H  | 3.217955  | 3.368101  | 0.003097  |
| H  | 3.526876  | 3.076873  | 2.460688  |
| H  | 1.529026  | 2.842771  | 3.946173  |
| C  | -1.100835 | 2.769928  | 3.229341  |
| C  | -2.490218 | 0.400446  | -3.140843 |

|   |           |           |           |
|---|-----------|-----------|-----------|
| H | -3.802370 | -1.959914 | -3.504707 |
| H | -5.428982 | -3.079394 | -1.975489 |
| H | -5.990654 | -2.034798 | 0.222325  |
| C | -5.042924 | 0.298400  | 1.273487  |
| C | 1.100800  | -2.769451 | 3.229409  |
| H | -1.529046 | -2.842480 | 3.946306  |
| H | -3.526894 | -3.076780 | 2.460876  |
| H | -3.218016 | -3.368169 | 0.003289  |
| C | -0.889973 | -3.437668 | -1.411793 |
| C | 5.042032  | -0.298198 | 1.273994  |
| H | 5.989668  | 2.035175  | 0.223171  |
| H | 5.428828  | 3.079480  | -1.975016 |
| H | 3.803258  | 1.959511  | -3.504946 |
| C | 2.491327  | -0.401018 | -3.141501 |
| H | -5.768412 | -0.321217 | 1.822503  |
| H | -4.131531 | 0.394022  | 1.887523  |
| H | -5.457683 | 1.313384  | 1.163423  |
| H | -2.429085 | -0.143481 | -4.095794 |
| H | -2.785078 | 1.442572  | -3.344154 |
| H | -1.480235 | 0.436270  | -2.697254 |
| H | -0.809071 | 2.803616  | 4.290291  |
| H | -1.874311 | 3.533949  | 3.049495  |
| H | -1.569277 | 1.789264  | 3.033181  |
| H | 1.867989  | 3.468752  | -1.914114 |
| H | 0.321077  | 2.582747  | -1.813474 |
| H | 0.326268  | 4.348500  | -1.674414 |
| H | 2.431467  | 0.142139  | -4.096973 |
| H | 2.785757  | -1.443491 | -3.343612 |
| H | 1.480855  | -0.435859 | -2.698945 |
| H | 5.766553  | 0.322013  | 1.823613  |
| H | 4.130307  | -0.394824 | 1.887370  |
| H | 5.457866  | -1.312763 | 1.164060  |
| H | -1.868032 | -3.469161 | -1.913928 |
| H | -0.321291 | -2.582854 | -1.813378 |
| H | -0.326135 | -4.348590 | -1.674097 |
| H | 0.809195  | -2.803812 | 4.290381  |
| H | 1.874704  | -3.532913 | 3.049076  |
| H | 1.568617  | -1.788404 | 3.033642  |

#### D5

|   |           |           |           |
|---|-----------|-----------|-----------|
| C | 3.163712  | -2.388778 | -3.182535 |
| C | 2.312679  | -1.307692 | -3.531345 |
| C | 2.859729  | -0.122123 | -4.086220 |
| C | 4.247763  | -0.028364 | -4.281709 |
| C | 5.089095  | -1.104365 | -3.972943 |
| C | 4.543259  | -2.271689 | -3.425746 |
| C | 0.844370  | -1.585556 | -3.679473 |
| C | -0.101812 | -1.858340 | -2.640809 |
| C | -1.342973 | -2.453899 | -3.054059 |

|    |           |           |           |
|----|-----------|-----------|-----------|
| C  | -1.655686 | -2.610690 | -4.418940 |
| C  | -0.758167 | -2.238427 | -5.419350 |
| C  | 0.491781  | -1.755470 | -5.038254 |
| C  | -2.377732 | -3.073558 | -2.157579 |
| C  | -2.433337 | -4.493632 | -2.107489 |
| C  | -3.495096 | -5.112146 | -1.428646 |
| C  | -4.472100 | -4.347145 | -0.777024 |
| C  | -4.410647 | -2.951656 | -0.832585 |
| C  | -3.390051 | -2.299370 | -1.550452 |
| Si | 0.193858  | -1.545991 | -0.715589 |
| Si | -1.172364 | -0.332903 | 0.695147  |
| Si | -0.195474 | 1.723003  | -0.042488 |
| C  | 0.105718  | 2.741542  | -1.708457 |
| C  | 1.349526  | 3.444728  | -1.857820 |
| C  | 1.666342  | 4.117878  | -3.054822 |
| C  | 0.769990  | 4.166405  | -4.121993 |
| C  | -0.482173 | 3.577046  | -3.959670 |
| C  | -0.837916 | 2.894345  | -2.773501 |
| C  | 2.384409  | 3.665198  | -0.790590 |
| C  | 2.439062  | 4.952741  | -0.189534 |
| C  | 3.502512  | 5.258545  | 0.673799  |
| C  | 4.481468  | 4.301070  | 0.972889  |
| C  | 4.419962  | 3.037895  | 0.377879  |
| C  | 3.397428  | 2.716396  | -0.535254 |
| C  | -2.306763 | 2.582776  | -2.746523 |
| C  | -3.157702 | 3.450859  | -2.013881 |
| C  | -4.536632 | 3.438963  | -2.286698 |
| C  | -5.082563 | 2.569305  | -3.238436 |
| C  | -4.241315 | 1.691532  | -3.933141 |
| C  | -2.853406 | 1.702198  | -3.715052 |
| Si | 1.167246  | 0.043660  | 0.776350  |
| C  | 2.696262  | 0.245505  | 1.942849  |
| C  | 3.965508  | -0.384597 | 1.711287  |
| C  | 5.107426  | 0.054957  | 2.416742  |
| C  | 5.042792  | 1.100799  | 3.337699  |
| C  | 3.793613  | 1.637390  | 3.652275  |
| C  | 2.615567  | 1.190716  | 3.016446  |
| C  | 4.187391  | -1.636921 | 0.910280  |
| C  | 5.248234  | -1.736684 | -0.032547 |
| C  | 5.592359  | -2.999926 | -0.549875 |
| C  | 4.901688  | -4.155029 | -0.179242 |
| C  | 3.859577  | -4.057003 | 0.749318  |
| C  | 3.509538  | -2.822166 | 1.320958  |
| C  | 1.383384  | 1.653192  | 3.764592  |
| C  | 0.875042  | 2.966263  | 3.631555  |
| C  | -0.007819 | 3.475134  | 4.602359  |
| C  | -0.390144 | 2.703339  | 5.702213  |
| C  | 0.091311  | 1.393768  | 5.821354  |
| C  | 0.981977  | 0.857761  | 4.875405  |

|   |           |           |           |
|---|-----------|-----------|-----------|
| C | -2.700700 | -0.978509 | 1.688415  |
| C | -3.969470 | -0.306891 | 1.718357  |
| C | -5.112712 | -0.984188 | 2.197420  |
| C | -5.050221 | -2.305226 | 2.641111  |
| C | -3.802200 | -2.924089 | 2.721196  |
| C | -2.623518 | -2.268221 | 2.306522  |
| C | -4.190832 | 1.157213  | 1.462386  |
| C | -5.246232 | 1.613109  | 0.624671  |
| C | -5.587525 | 2.978821  | 0.629988  |
| C | -4.900975 | 3.900944  | 1.421503  |
| C | -3.864967 | 3.451540  | 2.247846  |
| C | -3.516001 | 2.091698  | 2.301491  |
| C | -1.393085 | -2.990042 | 2.813161  |
| C | -0.870273 | -4.135331 | 2.169903  |
| C | -0.001523 | -4.993790 | 2.870080  |
| C | 0.359061  | -4.730351 | 4.193620  |
| C | -0.129796 | -3.577048 | 4.820427  |
| C | -1.010011 | -2.706823 | 4.155107  |
| H | 2.631655  | 4.624623  | -3.122494 |
| H | 1.026508  | 4.687384  | -5.047134 |
| H | -1.233508 | 3.672372  | -4.745648 |
| H | -6.057509 | -0.440144 | 2.236926  |
| H | -5.950939 | -2.822445 | 2.979324  |
| H | -3.711535 | -3.918120 | 3.163855  |
| H | 6.052829  | -0.461463 | 2.243567  |
| H | 5.942851  | 1.447374  | 3.850517  |
| H | 3.702041  | 2.381136  | 4.446462  |
| H | 1.244300  | -1.536431 | -5.797902 |
| H | -1.011893 | -2.360101 | -6.474757 |
| H | -2.618367 | -3.055839 | -4.680179 |
| C | 1.320005  | 3.861069  | 2.505444  |
| H | -0.383233 | 4.495832  | 4.487866  |
| H | -1.066795 | 3.111356  | 6.456692  |
| H | -0.202219 | 0.777231  | 6.674011  |
| C | 1.550262  | -0.527787 | 5.095488  |
| C | 6.066767  | -0.557823 | -0.527576 |
| H | 6.426873  | -3.064760 | -1.251510 |
| H | 5.186210  | -5.125846 | -0.591630 |
| H | 3.335481  | -4.955918 | 1.083608  |
| C | 2.521902  | -2.826439 | 2.465289  |
| C | -2.601620 | 4.447181  | -1.016168 |
| H | -5.178980 | 4.142277  | -1.757170 |
| H | -6.155614 | 2.583372  | -3.443528 |
| H | -4.654391 | 1.002536  | -4.674505 |
| C | -1.961627 | 0.803429  | -4.545228 |
| C | 1.350587  | 5.979890  | -0.440459 |
| H | 3.538917  | 6.246374  | 1.140425  |
| H | 5.285843  | 4.537306  | 1.673155  |
| H | 5.175390  | 2.289853  | 0.617824  |



|   |           |           |           |
|---|-----------|-----------|-----------|
| C | 3.445414  | 1.416381  | -1.300437 |
| C | -6.067464 | 0.715203  | -0.283784 |
| H | -6.416867 | 3.309788  | 0.001256  |
| H | -5.182967 | 4.956359  | 1.412155  |
| H | -3.344806 | 4.151990  | 2.906099  |
| C | -2.534788 | 1.654076  | 3.364573  |
| C | -1.265959 | -4.489001 | 0.761336  |
| H | 0.380446  | -5.883562 | 2.361767  |
| H | 1.023769  | -5.409548 | 4.732482  |
| H | 0.147158  | -3.355049 | 5.853593  |
| C | -1.587462 | -1.522703 | 4.900487  |
| C | -1.346530 | -5.343074 | -2.740412 |
| H | -3.531557 | -6.203679 | -1.383935 |
| H | -5.274244 | -4.837386 | -0.220817 |
| H | -5.164177 | -2.356262 | -0.317149 |
| C | -3.439456 | -0.804559 | -1.751006 |
| C | 1.968042  | 1.027236  | -4.504944 |
| H | 4.661096  | 0.892223  | -4.702039 |
| H | 6.162628  | -1.037794 | -4.164736 |
| H | 5.186858  | -3.121572 | -3.200094 |
| C | 2.607447  | -3.691237 | -2.642409 |
| H | -1.472510 | -6.402091 | -2.466933 |
| H | -1.353647 | -5.265379 | -3.840150 |
| H | -0.347052 | -5.014062 | -2.412169 |
| H | -3.697980 | -0.269409 | -0.830257 |
| H | -2.489609 | -0.406235 | -2.118293 |
| H | -4.207302 | -0.541423 | -2.495597 |
| H | 3.383529  | -4.469614 | -2.633691 |
| H | 2.250912  | -3.573194 | -1.605691 |
| H | 1.755099  | -4.041030 | -3.246917 |
| H | 2.553418  | 1.948633  | -4.625933 |
| H | 1.459395  | 0.819649  | -5.461615 |
| H | 1.178919  | 1.222341  | -3.766517 |
| H | 3.706724  | 0.568898  | -0.657160 |
| H | 2.494558  | 1.190501  | -1.791718 |
| H | 4.212258  | 1.460698  | -2.090019 |
| H | -2.547741 | 0.001176  | -5.013334 |
| H | -1.453182 | 1.364474  | -5.347515 |
| H | -1.172491 | 0.337319  | -3.940062 |
| H | 1.479737  | 6.852157  | 0.218812  |
| H | 1.350950  | 6.330943  | -1.485631 |
| H | 0.353012  | 5.548209  | -0.257848 |
| H | -3.375164 | 5.168715  | -0.716568 |
| H | -2.254266 | 3.940825  | -0.100341 |
| H | -1.743199 | 4.995470  | -1.436152 |
| H | 5.872681  | -0.398104 | -1.600297 |
| H | 5.838817  | 0.374169  | -0.002530 |
| H | 7.144620  | -0.763201 | -0.412092 |
| H | 2.423454  | -3.839201 | 2.871621  |

|   |           |           |           |
|---|-----------|-----------|-----------|
| H | 2.854280  | -2.160105 | 3.271572  |
| H | 1.510659  | -2.503811 | 2.169152  |
| H | 0.457868  | 4.355866  | 2.029445  |
| H | 1.992144  | 4.655349  | 2.870079  |
| H | 1.862505  | 3.301258  | 1.739319  |
| H | 1.230364  | -0.929125 | 6.068302  |
| H | 1.213433  | -1.227943 | 4.319599  |
| H | 2.651639  | -0.514822 | 5.065253  |
| H | -2.436115 | 2.434672  | 4.127073  |
| H | -2.872888 | 0.731357  | 3.854206  |
| H | -1.522543 | 1.464736  | 2.972434  |
| H | -7.143746 | 0.840153  | -0.075411 |
| H | -5.898773 | 0.998596  | -1.335154 |
| H | -5.820627 | -0.345020 | -0.177764 |
| H | -1.262494 | -1.527965 | 5.951380  |
| H | -1.261942 | -0.573986 | 4.453557  |
| H | -2.688946 | -1.532501 | 4.873083  |
| H | -0.382694 | -4.513250 | 0.100777  |
| H | -1.733086 | -5.486323 | 0.715575  |
| H | -1.975847 | -3.766685 | 0.351253  |

#### D7

|    |          |           |           |
|----|----------|-----------|-----------|
| C  | 5.149076 | -3.581040 | 2.232728  |
| C  | 4.379527 | -3.969718 | 1.102489  |
| C  | 3.484534 | -5.070724 | 1.219361  |
| C  | 3.357032 | -5.735692 | 2.451445  |
| C  | 4.106950 | -5.347310 | 3.565319  |
| C  | 4.997024 | -4.273006 | 3.447614  |
| C  | 4.803554 | -3.481603 | -0.259660 |
| C  | 4.833959 | -2.129397 | -0.774526 |
| C  | 5.648122 | -1.960012 | -1.953030 |
| C  | 6.209305 | -3.057890 | -2.643800 |
| C  | 6.041892 | -4.365292 | -2.196255 |
| C  | 5.381443 | -4.552413 | -0.986512 |
| Si | 3.334357 | -0.737449 | -0.601276 |
| Si | 2.428238 | 0.712111  | 0.973140  |
| C  | 2.756553 | 1.702678  | 2.741666  |
| C  | 2.292965 | 1.365025  | 4.066025  |
| C  | 2.583311 | 2.200051  | 5.172577  |
| C  | 3.372858 | 3.338625  | 5.058412  |
| C  | 3.915633 | 3.628000  | 3.812701  |
| C  | 3.621429 | 2.851267  | 2.666797  |
| C  | 1.707230 | 0.071213  | 4.567025  |
| C  | 2.544760 | -1.072744 | 4.593267  |
| C  | 2.140327 | -2.211305 | 5.315170  |
| C  | 0.926520 | -2.232277 | 6.010696  |
| C  | 0.120562 | -1.087651 | 6.017978  |
| C  | 0.506298 | 0.073386  | 5.328359  |
| C  | 4.462746 | 3.309462  | 1.504227  |

|    |           |           |           |
|----|-----------|-----------|-----------|
| C  | 4.346091  | 4.660453  | 1.068871  |
| C  | 5.342245  | 5.203185  | 0.244554  |
| C  | 6.447214  | 4.443266  | -0.156824 |
| C  | 6.567465  | 3.122145  | 0.280974  |
| C  | 5.599410  | 2.548021  | 1.125567  |
| C  | 3.908657  | -1.049497 | 3.946599  |
| C  | -0.391218 | 1.291111  | 5.398679  |
| C  | 3.226558  | 5.565744  | 1.553165  |
| C  | 5.858368  | 1.166184  | 1.679394  |
| C  | 6.173040  | -0.677534 | -2.548009 |
| C  | 5.821666  | -0.318985 | -3.877099 |
| C  | 6.617391  | 0.599551  | -4.579667 |
| C  | 7.725486  | 1.205852  | -3.972690 |
| C  | 8.048732  | 0.881539  | -2.651075 |
| C  | 7.307269  | -0.081061 | -1.939465 |
| C  | 4.585636  | -0.902812 | -4.527369 |
| C  | 7.825794  | -0.570369 | -0.602763 |
| C  | 2.669401  | -5.595648 | 0.050554  |
| C  | 6.215571  | -2.511589 | 2.123369  |
| Si | 0.316623  | 0.758170  | -0.400271 |
| C  | 0.453165  | 1.624394  | -2.143654 |
| C  | -0.518020 | 1.497744  | -3.225551 |
| C  | -0.063329 | 1.169858  | -4.511146 |
| C  | 1.302534  | 1.169773  | -4.814740 |
| C  | 2.170623  | 1.738086  | -3.894402 |
| C  | 1.776860  | 2.063081  | -2.563121 |
| C  | -1.905815 | 2.113998  | -3.310744 |
| C  | -3.022043 | 1.382327  | -3.802582 |
| C  | -4.158345 | 2.048856  | -4.289287 |
| C  | -4.251605 | 3.439175  | -4.264379 |
| C  | -3.164764 | 4.170884  | -3.785293 |
| C  | -1.980864 | 3.544724  | -3.352462 |
| C  | 2.553643  | 3.202826  | -1.956116 |
| C  | 3.862806  | 3.528750  | -2.435043 |
| C  | 4.246660  | 4.866709  | -2.589799 |
| C  | 3.406804  | 5.914400  | -2.197738 |
| C  | 2.259145  | 5.589138  | -1.472848 |
| C  | 1.862539  | 4.253951  | -1.274634 |
| C  | -2.994181 | -0.110826 | -3.978647 |
| C  | -0.821899 | 4.480262  | -3.070184 |
| C  | 4.877828  | 2.469855  | -2.756581 |
| C  | 0.740481  | 4.008655  | -0.320337 |
| Si | -1.849533 | 0.995945  | 0.679266  |
| C  | -2.439461 | 1.753240  | 2.349524  |
| C  | -3.130111 | 0.915714  | 3.301376  |
| C  | -3.606646 | 1.480236  | 4.505467  |
| C  | -3.476181 | 2.836129  | 4.788595  |
| C  | -2.816316 | 3.649891  | 3.874433  |
| C  | -2.261445 | 3.141695  | 2.674814  |

|    |           |           |           |
|----|-----------|-----------|-----------|
| C  | -3.341556 | -0.578530 | 3.272349  |
| C  | -4.642530 | -1.106635 | 3.551996  |
| C  | -4.790168 | -2.457533 | 3.903118  |
| C  | -3.677624 | -3.295719 | 4.030578  |
| C  | -2.414789 | -2.789879 | 3.728151  |
| C  | -2.230572 | -1.459750 | 3.315535  |
| C  | -1.611598 | 4.261144  | 1.889541  |
| C  | -2.180831 | 4.753863  | 0.686946  |
| C  | -1.884456 | 6.064358  | 0.262802  |
| C  | -0.983683 | 6.866690  | 0.970110  |
| C  | -0.312502 | 6.326113  | 2.077062  |
| C  | -0.605435 | 5.034002  | 2.546058  |
| C  | -5.901099 | -0.263777 | 3.496294  |
| C  | -0.841178 | -1.068019 | 2.906280  |
| C  | -3.029373 | 3.885848  | -0.196036 |
| C  | 0.197841  | 4.479075  | 3.709373  |
| Si | -3.311929 | -0.182418 | -0.583549 |
| Si | -1.346023 | -1.405520 | -0.890509 |
| C  | -1.126563 | -3.380522 | -1.259702 |
| C  | -1.053825 | -3.723176 | -2.655172 |
| C  | -1.114158 | -5.067629 | -3.085250 |
| C  | -1.109871 | -6.119409 | -2.178947 |
| C  | -1.013025 | -5.814047 | -0.825244 |
| C  | -1.044324 | -4.489323 | -0.321526 |
| C  | -0.681090 | -2.835954 | -3.820151 |
| C  | -1.581306 | -2.656575 | -4.900765 |
| C  | -1.125552 | -2.083254 | -6.099459 |
| C  | 0.220248  | -1.736605 | -6.259826 |
| C  | 1.123295  | -1.978090 | -5.218078 |
| C  | 0.698288  | -2.540978 | -4.003045 |
| C  | -0.771284 | -4.496839 | 1.168168  |
| C  | -1.415588 | -5.442023 | 2.033437  |
| C  | -0.876925 | -5.714230 | 3.304307  |
| C  | 0.265162  | -5.058601 | 3.768361  |
| C  | 0.865924  | -4.103612 | 2.947942  |
| C  | 0.377858  | -3.824564 | 1.661788  |
| C  | -3.019123 | -3.100142 | -4.777280 |
| C  | 1.721850  | -2.909788 | -2.956603 |
| C  | -2.663006 | -6.237543 | 1.685453  |
| C  | 1.184579  | -2.879543 | 0.821760  |
| C  | -5.276864 | -0.209163 | -0.350950 |
| C  | -5.915482 | -1.480396 | -0.492687 |
| C  | -7.203760 | -1.719038 | 0.030263  |
| C  | -7.934964 | -0.698551 | 0.633733  |
| C  | -7.410286 | 0.594524  | 0.600156  |
| C  | -6.126835 | 0.882199  | 0.086114  |
| C  | -5.388501 | -2.638882 | -1.289742 |
| C  | -5.914545 | -2.831902 | -2.600477 |
| C  | -5.659501 | -4.042224 | -3.262383 |

|   |           |           |           |
|---|-----------|-----------|-----------|
| C | -4.858881 | -5.026770 | -2.671832 |
| C | -4.327804 | -4.816271 | -1.398875 |
| C | -4.612830 | -3.642730 | -0.672104 |
| C | -6.742545 | -1.776284 | -3.308424 |
| C | -4.177804 | -3.491376 | 0.768699  |
| C | -6.018501 | 2.358404  | -0.228054 |
| C | -6.330095 | 2.725684  | -1.566099 |
| C | -6.462169 | 4.084159  | -1.902527 |
| C | -6.348929 | 5.082952  | -0.930027 |
| C | -6.141758 | 4.714326  | 0.403173  |
| C | -5.999258 | 3.365744  | 0.773271  |
| C | -6.700921 | 1.671780  | -2.584868 |
| C | -5.832387 | 3.033859  | 2.236014  |
| H | 6.813333  | -2.858636 | -3.531996 |
| H | 6.466322  | -5.210188 | -2.743197 |
| H | 5.334504  | -5.554149 | -0.556310 |
| H | 3.154308  | 2.023457  | -4.249557 |
| H | 1.652507  | 0.897569  | -5.811171 |
| H | -0.794537 | 1.026169  | -5.307608 |
| H | -1.080392 | -5.267488 | -4.157442 |
| H | -1.106791 | -7.157773 | -2.517561 |
| H | -0.875347 | -6.631661 | -0.119102 |
| H | -8.025797 | 1.433584  | 0.929801  |
| H | -8.925602 | -0.887480 | 1.052842  |
| H | -7.627854 | -2.719260 | -0.076534 |
| H | -2.716030 | 4.716631  | 4.078002  |
| H | -3.873708 | 3.251743  | 5.716942  |
| H | -4.074450 | 0.821569  | 5.236750  |
| H | 2.649764  | -6.563985 | 2.530286  |
| H | 4.006401  | -5.880954 | 4.513420  |
| H | 5.614200  | -3.977838 | 4.300149  |
| H | 8.920030  | 1.336373  | -2.171983 |
| H | 8.327774  | 1.930219  | -4.525859 |
| H | 6.343215  | 0.860193  | -5.605398 |
| H | 4.615657  | 4.457974  | 3.709920  |
| H | 3.609512  | 3.948768  | 5.933182  |
| H | 2.232048  | 1.893069  | 6.158545  |
| H | 5.242622  | 6.237266  | -0.087734 |
| H | 7.211656  | 4.881906  | -0.802346 |
| H | 7.433786  | 2.523947  | -0.010099 |
| H | -0.829915 | -1.089380 | 6.556627  |
| H | 0.616907  | -3.127124 | 6.554796  |
| H | 2.798314  | -3.083533 | 5.326803  |
| H | -2.368492 | 6.439232  | -0.642037 |
| H | -0.770950 | 7.885638  | 0.639124  |
| H | 0.457033  | 6.907962  | 2.589024  |
| H | -1.536259 | -3.416245 | 3.819568  |
| H | -3.792537 | -4.334828 | 4.347661  |
| H | -5.796017 | -2.841584 | 4.092123  |

|   |           |           |           |
|---|-----------|-----------|-----------|
| H | -1.381555 | -6.450671 | 3.936046  |
| H | 0.681690  | -5.281434 | 4.752383  |
| H | 1.764072  | -3.590373 | 3.275748  |
| H | 2.181532  | -1.752595 | -5.348600 |
| H | 0.568665  | -1.299408 | -7.198656 |
| H | -1.837572 | -1.927485 | -6.914319 |
| H | 5.233692  | 5.076495  | -3.009787 |
| H | 3.685659  | 6.956260  | -2.371239 |
| H | 1.649791  | 6.374125  | -1.019907 |
| H | -3.193661 | 5.263670  | -3.806170 |
| H | -5.137730 | 3.946280  | -4.649874 |
| H | -4.966529 | 1.452757  | -4.716172 |
| H | -6.696930 | 4.346858  | -2.935240 |
| H | -6.453009 | 6.135508  | -1.202861 |
| H | -6.083729 | 5.479154  | 1.181110  |
| H | -3.688688 | -5.582719 | -0.970095 |
| H | -4.641223 | -5.953922 | -3.206040 |
| H | -6.072496 | -4.195742 | -4.262237 |
| H | 4.510300  | -1.901220 | 4.281888  |
| H | 3.836004  | -1.098132 | 2.848547  |
| H | 4.439738  | -0.118325 | 4.193971  |
| H | -1.373796 | 1.017317  | 5.803432  |
| H | 0.031224  | 2.081032  | 6.041277  |
| H | -0.546762 | 1.745874  | 4.410826  |
| H | 6.932178  | 0.933620  | 1.655618  |
| H | 5.497998  | 1.064642  | 2.711386  |
| H | 5.341868  | 0.395973  | 1.080670  |
| H | 3.103717  | 6.415277  | 0.868721  |
| H | 2.269035  | 5.035101  | 1.623865  |
| H | 3.441385  | 5.971360  | 2.556869  |
| H | 6.731811  | -2.374161 | 3.085599  |
| H | 6.960435  | -2.784363 | 1.358361  |
| H | 5.790582  | -1.546830 | 1.820459  |
| H | 1.624870  | -5.755621 | 0.357851  |
| H | 2.680795  | -4.909260 | -0.804180 |
| H | 3.063732  | -6.565930 | -0.299143 |
| H | 8.535495  | 0.150774  | -0.167891 |
| H | 7.016714  | -0.749095 | 0.111580  |
| H | 8.353772  | -1.532377 | -0.731516 |
| H | 4.459730  | -0.517804 | -5.551835 |
| H | 4.628111  | -2.002999 | -4.570264 |
| H | 3.687960  | -0.635940 | -3.946588 |
| H | 2.168301  | -2.717525 | 1.271939  |
| H | 1.318830  | -3.246635 | -0.201753 |
| H | 0.733723  | -1.883650 | 0.742185  |
| H | -3.411599 | -6.122323 | 2.486017  |
| H | -3.121823 | -5.918619 | 0.751413  |
| H | -2.434430 | -7.314242 | 1.602011  |
| H | 2.742248  | -2.837666 | -3.355845 |

|   |           |           |           |
|---|-----------|-----------|-----------|
| H | 1.669365  | -2.230726 | -2.091739 |
| H | 1.558328  | -3.933809 | -2.584074 |
| H | -3.647886 | -2.635037 | -5.551844 |
| H | -3.112899 | -4.194068 | -4.875774 |
| H | -3.429856 | -2.846831 | -3.793976 |
| H | -3.094133 | -3.592351 | 0.887968  |
| H | -4.465062 | -2.525192 | 1.197006  |
| H | -4.638846 | -4.269603 | 1.395902  |
| H | -7.303838 | -2.224199 | -4.143204 |
| H | -7.453201 | -1.280596 | -2.632631 |
| H | -6.097340 | -0.987300 | -3.730312 |
| H | -6.913272 | 2.125979  | -3.562485 |
| H | -5.909948 | 0.925691  | -2.709740 |
| H | -7.599714 | 1.128021  | -2.246809 |
| H | -5.658740 | 3.944045  | 2.827054  |
| H | -6.725515 | 2.529867  | 2.641359  |
| H | -4.984156 | 2.362196  | 2.397987  |
| H | -3.706467 | 4.466107  | -0.835963 |
| H | -2.388247 | 3.302419  | -0.877223 |
| H | -3.633591 | 3.182235  | 0.381250  |
| H | 1.035696  | 5.148428  | 3.950871  |
| H | -0.405919 | 4.341336  | 4.619292  |
| H | 0.623910  | 3.495469  | 3.461647  |
| H | -5.841600 | 0.486781  | 2.706780  |
| H | -6.771645 | -0.903013 | 3.287125  |
| H | -6.094612 | 0.268138  | 4.443462  |
| H | -0.085276 | -1.656569 | 3.433116  |
| H | -0.724199 | -1.288242 | 1.836547  |
| H | -0.624703 | -0.004392 | 3.051072  |
| H | 0.377449  | 4.956638  | 0.072620  |
| H | -0.104718 | 3.471323  | -0.769605 |
| H | 1.091533  | 3.397401  | 0.526287  |
| H | 5.784820  | 2.641686  | -2.160364 |
| H | 4.506270  | 1.469205  | -2.516669 |
| H | 5.183877  | 2.489885  | -3.812006 |
| H | -0.840485 | 5.314266  | -3.790238 |
| H | -0.896404 | 4.925105  | -2.066567 |
| H | 0.152376  | 3.992294  | -3.145979 |
| H | -3.850667 | -0.597509 | -3.484206 |
| H | -3.049745 | -0.369310 | -5.047598 |
| H | -2.071614 | -0.545033 | -3.589457 |
